# Supplementary material for: Improving epilepsy control among children with cerebral palsy in rural Bangladesh: a prospective cohort-based study
Source: PubMed Central journal article supplement — BMJ Open. 2022 Apr 4;12(4):e052578. doi: 10.1136/bmjopen-2021-052578 (PMC8984049; doi:10.1136/bmjopen-2021-052578), 2022-04-04
Supplement: bmjopen-2021-052578.draft_revisions.pdf [file bmjopen-2021-052578.draft_revisions.pdf]

# BMJ Open

BMJ Open is committed to open peer review. As part of this commitment we make the peer review history of every article we publish publicly available.

When an article is published we post the peer reviewers' comments and the authors' responses online. We also post the versions of the paper that were used during peer review. These are the versions that the peer review comments apply to.

The versions of the paper that follow are the versions that were submitted during the peer review process. They are not the versions of record or the final published versions. They should not be cited or distributed as the published version of this manuscript.

BMJ Open is an open access journal and the full, final, typeset and author-corrected version of record of the manuscript is available on our site with no access controls, subscription charges or pay-per-view fees (<http://bmjopen.bmj.com>).

If you have any questions on BMJ Open's open peer review process please email [info.bmjopen@bmj.com](mailto:info.bmjopen@bmj.com)

# BMJ Open

## Improving epilepsy control among children with cerebral palsy in rural Bangladesh: A prospective cohort-based study

|                               |                                                                                                                                                                                                                                                                                                                                                                                                                                                                                                                                                                                                                                                                                                                                                                                                                                                                                                                                                                                                                                                         |
|-------------------------------|---------------------------------------------------------------------------------------------------------------------------------------------------------------------------------------------------------------------------------------------------------------------------------------------------------------------------------------------------------------------------------------------------------------------------------------------------------------------------------------------------------------------------------------------------------------------------------------------------------------------------------------------------------------------------------------------------------------------------------------------------------------------------------------------------------------------------------------------------------------------------------------------------------------------------------------------------------------------------------------------------------------------------------------------------------|
| Journal:                      | <i>BMJ Open</i>                                                                                                                                                                                                                                                                                                                                                                                                                                                                                                                                                                                                                                                                                                                                                                                                                                                                                                                                                                                                                                         |
| Manuscript ID                 | bmjopen-2021-052578                                                                                                                                                                                                                                                                                                                                                                                                                                                                                                                                                                                                                                                                                                                                                                                                                                                                                                                                                                                                                                     |
| Article Type:                 | Original research                                                                                                                                                                                                                                                                                                                                                                                                                                                                                                                                                                                                                                                                                                                                                                                                                                                                                                                                                                                                                                       |
| Date Submitted by the Author: | 21-Apr-2021                                                                                                                                                                                                                                                                                                                                                                                                                                                                                                                                                                                                                                                                                                                                                                                                                                                                                                                                                                                                                                             |
| Complete List of Authors:     | <p>Karim, Tasneem; The University of Sydney, Discipline of Child and Adolescent Health, Children's Hospital at Westmead Clinical School; CSF Global</p> <p>Das, Manik Chandra; CSF Global; University of South Asia, Asian Institute of Disability and Development</p> <p>Muhit, Mohammad; CSF Global; University of South Asia, Asian Institute of Disability and Development</p> <p>Badawi, Nadia; The University of Sydney, Discipline of Child and Adolescent Health, Children's Hospital at Westmead Clinical School; The University of Sydney, Cerebral Palsy Alliance Research Institute, Specialty of Child &amp; Adolescent Health, Sydney Medical School, Faculty of Medicine &amp; Health</p> <p>Khandaker, Gulam; The University of Sydney, Discipline of Child and Adolescent Health, Children's Hospital at Westmead Clinical School; Central Queensland Hospital and Health Service</p> <p>Mohammad, Shekeeb S; The University of Sydney, Discipline of Child and Adolescent Health, Children's Hospital at Westmead Clinical School</p> |
| Keywords:                     | Epilepsy < NEUROLOGY, Developmental neurology & neurodisability < PAEDIATRICS, PUBLIC HEALTH                                                                                                                                                                                                                                                                                                                                                                                                                                                                                                                                                                                                                                                                                                                                                                                                                                                                                                                                                            |
|                               |                                                                                                                                                                                                                                                                                                                                                                                                                                                                                                                                                                                                                                                                                                                                                                                                                                                                                                                                                                                                                                                         |

SCHOLARONE™  
Manuscripts

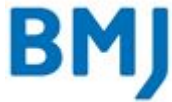

I, the Submitting Author has the right to grant and does grant on behalf of all authors of the Work (as defined in the below author licence), an exclusive licence and/or a non-exclusive licence for contributions from authors who are: i) UK Crown employees; ii) where BMJ has agreed a CC-BY licence shall apply, and/or iii) in accordance with the terms applicable for US Federal Government officers or employees acting as part of their official duties; on a worldwide, perpetual, irrevocable, royalty-free basis to BMJ Publishing Group Ltd ("BMJ") its licensees and where the relevant Journal is co-owned by BMJ to the co-owners of the Journal, to publish the Work in this journal and any other BMJ products and to exploit all rights, as set out in our [licence](#).

The Submitting Author accepts and understands that any supply made under these terms is made by BMJ to the Submitting Author unless you are acting as an employee on behalf of your employer or a postgraduate student of an affiliated institution which is paying any applicable article publishing charge ("APC") for Open Access articles. Where the Submitting Author wishes to make the Work available on an Open Access basis (and intends to pay the relevant APC), the terms of reuse of such Open Access shall be governed by a Creative Commons licence – details of these licences and which [Creative Commons](#) licence will apply to this Work are set out in our licence referred to above.

Other than as permitted in any relevant BMJ Author's Self Archiving Policies, I confirm this Work has not been accepted for publication elsewhere, is not being considered for publication elsewhere and does not duplicate material already published. I confirm all authors consent to publication of this Work and authorise the granting of this licence.

1  
2  
3 **Improving epilepsy control among children with cerebral palsy in rural Bangladesh: A prospective**  
4 **cohort-based study**  
5

6 Tasneem KARIM<sup>1,2,3\*</sup>, Manik Chandra DAS<sup>1,2</sup>, Mohammad MUHIT<sup>1,2</sup>, Nadia BADAWI<sup>3,4</sup>, Gulam  
7 KHANDAKER<sup>1,2,3,5</sup>, Shekeeb S MOHAMMAD<sup>3</sup>  
8  
9

10  
11 <sup>1</sup>CSF Global, Dhaka, Bangladesh

12 <sup>2</sup>Asian Institute of Disability and Development (AIDD), University of South Asia, Dhaka, Bangladesh

13 <sup>3</sup>Discipline of Child and Adolescent Health, Sydney Medical School, University of Sydney, Sydney,  
14 Australia

15 <sup>4</sup>Cerebral Palsy Alliance Research Institute, University of Sydney, Sydney, Australia

16 <sup>5</sup>Central Queensland Public Health Unit, Central Queensland Hospital and Health Service,  
17 Rockhampton, Queensland, Australia

18  
19  
20  
21  
22  
23  
24  
25 Word count: 2672, 3 figures, 1 table, 24 references  
26  
27  
28  
29  
30  
31  
32  
33  
34  
35  
36  
37  
38  
39  
40  
41  
42  
43  
44  
45  
46  
47  
48  
49

50 **Corresponding Author**

51 Dr Shekeeb S Mohammad

52 The University of Sydney Children's Hospital Westmead Clinical School, Locked Bag 4001, NSW 2145  
53 Australia

54 Tel: 00 61 298 450 182

55 Email: [shekeeb.mohammad@sydney.edu.au](mailto:shekeeb.mohammad@sydney.edu.au)  
56  
57  
58  
59  
60

**ABSTRACT**

**Objective:** To define the prevalence and seizure subtypes among children with cerebral palsy (CP) in rural Bangladesh and explore barriers to optimum epilepsy control.

**Design:** Prospective cohort study

**Setting:** The study was conducted in Shahjadpur, a rural subdistrict of Bangladesh.

**Participants:** Children (<18 years) with CP and epilepsy identified using the Bangladesh CP Register in the study site.

**Methods:** Assessments were conducted in three focused epilepsy clinics overseen by a pediatric neurologist between December 2016 - January 2018, with intervening phone and video-conference follow-ups. Details of event type, frequency and medication compliance were collected. Antiepileptic drugs (AED) were prescribed based on seizure type, family income, comorbidity and medication availability.

**Results:** 23.4% (170/726) of the BCPR cohort had a clinical diagnosis of epilepsy of whom 166 were assessed. Following the focused epilepsy clinics, 62.0% (103/166) children were clinically determined to have ongoing epileptic seizures. 62.1% (64/103) had generalized tonic clonic seizures, 27.2% (28/103) had focal seizures with altered awareness and 10.7% (11/103) had other seizure types. None of the children with prolonged seizures (31/103) had an emergency seizure management plan. Non-epileptic events were being pharmacologically treated as seizures in 18.1% (30/166) children. Financial constraints were the main reason for non-compliance on follow up.

**Conclusions:** Gaps in optimum epilepsy management in rural Bangladesh are amenable to improvement anchored with local health care workers. Training and clinical care focused on recognition of common seizure types, seizure mimics and rationalizing use of available AEDs can be facilitated by better referral pathways and telehealth support.

**Key Words:** Epilepsy, cerebral palsy, Bangladesh, CP

### Strengths and limitations of this study

- Children with CP and epilepsy identified through an ongoing population-based surveillance.
- Specialist clinical assessments were conducted overseen by a pediatric neurologist.
- Phone and video-conference follow-ups were conducted.
- The study provided opportunity for continuing local capacity building.
- The clinical diagnoses relied on clinical impression and were not corroborated by investigations.

For peer review only

## INTRODUCTION

Cerebral palsy (CP) is a term that defines a heterogeneous group of early-onset, non-progressive, neurodevelopmental disorders secondary to injury to the developing brain [1]. Studies show that epilepsy is associated with greater impairment of cognitive function, poorer motor outcomes, more profound behavioral and psychological problems, and poorer quality of life among children with CP, all of which collectively contribute to a greater burden of disability and care [2]. Children with CP and epilepsy tend to have early onset of seizures which can often be difficult to control [3].

Recent estimates from a population-based study in Bangladesh showed a high burden of CP with an estimated prevalence of 3.4 per 1000 children [4]. Bangladesh is one of the most densely populated and under resourced countries in the world [5]. The World Health Organization (WHO) classified Bangladesh as one of the countries with severe shortages of health workers. There is inequity in the skill mix and distribution of health workers between urban and rural Bangladesh [6]. One of the four axes of the value-based framework for global health delivery highlights the need for alignment of care delivery to the local context [7].

Resources for the diagnosis and management of neurologic disorders such as epilepsy are often limited in low and middle-income countries (LMICs) such as Bangladesh [8]. Several aspects of epilepsy management that may be considered routine in tertiary or specialist settings are not applicable to community-based settings [9]. There is a substantial epilepsy treatment gap in low resource settings owing to a wide spectrum of factors including shortage of doctors particularly in the rural areas, [6] lack of available investigation and inpatient treatment facilities as well as decreased service utilization due to the stigma around a disability diagnosis. [10]

We aimed to define the prevalence, clinical phenotypes and barriers to optimum epilepsy control among children with CP in a community-based setting in Bangladesh.

## METHODS AND ANALYSIS

### Cohort compilation

We used the Bangladesh CP Register (BCPR); a prospective population-based surveillance of children with CP in Shahjadpur a northern subdistrict of Rajshahi division in Bangladesh for identification of children with CP and epilepsy. Detailed account of the BCPR study protocol and findings have been described in previous publications [4]. During previous BCPR camps, a diagnosis of epilepsy had been

1  
2  
3 based on history of one or more unprovoked seizures in the previous 3 months recorded by medical  
4 practitioners and review of any available medical records [4].  
5  
6  
7

### 8 **Clinical assessment of epilepsy**

9  
10 Children with CP and epilepsy identified via the BCPR were clinically reviewed in three focused  
11 epilepsy clinics held for three days each time at three different locations within the BCPR study site.  
12 Specialist clinical assessments at the clinics were overseen by a pediatric neurologist from Australia  
13 who travelled to Bangladesh for the focused epilepsy clinics during the study period. Diagnoses of  
14 epilepsy and seizure like events were reviewed during assessment in the clinics. Details of  
15 seizure and seizure like events were reviewed during assessment in the clinics. Details of  
16 seizure/event type, frequency, medication use and compliance were collected according to a  
17 predesigned standard proforma (Appendix A). Workflow during the clinic is outlined in Figure 1.  
18  
19  
20  
21  
22

### 23 **Local capacity building**

24  
25 Two physicians were trained by the pediatric neurologist in classifying seizure types according to the  
26 2017 International League Against Epilepsy (ILAE) guidelines [11], demonstration of clinical signs  
27 during the epilepsy clinics, and discussions around seizure mimics and drug choice (Appendix B).  
28 One community worker based in the study area was also trained to conduct phone follow ups of the  
29 children on antiepileptic drugs (AED).  
30  
31  
32  
33

### 34 **Selection of antiepileptic drugs**

35  
36 Before the clinics, the community worker collected information on availability and cost of AED in  
37 local pharmacies within the study area between December 2016 and January 2018. A dose  
38 equivalence table was drawn up for easy prescription in the clinic along with notes on important side  
39 effects and interactions. During the clinics, AED were prescribed based on seizure type, medication  
40 availability and family income. The approach undertaken for shared decision making in AED  
41 prescription is outlined in Figure 2.  
42  
43  
44  
45  
46  
47

### 48 **Telehealth supported follow up and clinics**

#### 49 *Phone follow up*

50  
51 Targeted phone follow ups of the children on AED were conducted by the trained community health  
52 worker every three months during the study period, following the initial specialist assessment at the  
53 focused epilepsy clinics. The phone follow ups were semi-structured. The design, conduct and the  
54 outcome measures for the follow ups were additionally informed by the study team's experience  
55  
56  
57  
58  
59  
60



1  
2  
3 and input from the primary caregivers (Appendix C). Seizure control was documented during phone  
4 follow ups. In our study seizure control was defined as no reported seizure since the last follow up.  
5  
6  
7

### 8 *Telemedicine clinics*

9  
10 Telemedicine clinics were initiated in May 2018 and held on a monthly basis using Skype as part of  
11 ongoing capacity building to improve epilepsy control among the study cohort. The local trained  
12 physician saw the patients face to face in the study site and used a handheld, internet connected  
13 tablet to videoconference with the pediatric neurologist in Australia. Patient interview for new and  
14 follow up patients followed a set format (Appendix C). New patient data from the telemedicine  
15 clinics are not included in this paper.  
16  
17  
18  
19  
20

### 21 **Patient and Public Involvement**

22  
23 This work was informed by the priorities, experience and preferences of the primary caregivers of  
24 the children with CP and epilepsy who participated in the study. The design and implementation of  
25 the follow ups, including outcome measures important to the study participants, relied on feedback  
26 from families of children with CP and epilepsy. Baseline information was communicated to the  
27 primary caregivers by the study team. This informed shared decision making related to the  
28 treatment and follow up for their children. Furthermore, the follow ups and telemedicine clinics  
29 were conducted by a local community worker and local physician, which enhanced community  
30 involvement during and beyond the study.  
31  
32  
33  
34  
35  
36  
37  
38

### 39 **Statistical analysis**

40 Descriptive analyses were carried out. All statistical analysis was conducted using SPSS version 24  
41 (IBM Armonk, NY, USA).  
42  
43  
44

### 45 **Ethics**

46 This study was conducted as part of the Bangladesh Cerebral Palsy Register Study which has been  
47 approved by the Bangladesh Medical Research Council (BMRC) Human Research Ethics Committee  
48 (Ref no. BMRC/NREC/2013–2016/1267) in Bangladesh, and by the Cerebral Palsy Alliance NHRMC  
49 Human Research Ethics Committee (Ref no.2015–03-02) in Australia. Written informed consent was  
50 taken from the primary caregiver/parents/guardian of the children with CP.  
51  
52  
53  
54  
55  
56

## 57 **RESULTS**

### 58 **Prevalence and basic demographic characteristics**

59  
60

1  
2  
3 726 children with CP were registered into the BCPR between January 2015 and December 2016,  
4 23.4% (170/726) of whom had a clinical diagnosis of epilepsy. 166 of these children attended the  
5 three focused epilepsy clinics between December 2016 and January 2018 and form the study cohort.  
6  
7 55 (33.1%) were female. The mean age of the children was 6 years 10 months (SD: 4 years 5 months)  
8  
9 years.

10  
11  
12  
13 After the focused epilepsy clinics, 62.0% (103/166) children were clinically determined to have  
14 ongoing epileptic seizures based on review of their history, existing medical records and specialist  
15 clinical evaluation (Figure 3). Therefore, the revised prevalence of epilepsy among the BCPR cohort  
16 during the study period was 14.3%.

### 21 **Seizure subtypes**

22  
23 62.1% (64/103) had generalized tonic clonic seizures (GTCS), 27.2% (28/103) had focal seizures with  
24 altered awareness and 5.8% (6/103) had other seizure types (focal seizures with preserved  
25 awareness, epileptic spasms, myoclonic seizures and tonic seizures). Data on seizure type was  
26 unclear on history for 4.9% (5/103). At the time of first assessment, seizures were already controlled  
27 with AED in 5.8% (6/103) children. 30.1% (31/103) of children had a history of prolonged seizures  
28 (>30 minutes) and none of these patients had an emergency seizure plan. Their caregivers tended to  
29 wait at home till the seizures settled and did not seek emergency medical assistance due to  
30 geographical or financial constraints.

### 37 **Barriers to optimum epilepsy control**

#### 38 *Non-epileptic events among children with CP*

39  
40 Non-epileptic events were determined to have been mislabeled as seizures in 18.1% (30/166)  
41 children which included extremity clonus (n=7), dystonic postures (n=6), spasticity related spasms  
42 (n=4), breath holding spells (n=3), mannerisms (n=3), sleep related myoclonic jerks (n=2), startles  
43 (n=2), stereotypies (n=2) and rhythmic movement disorders in sleep (n=1). 23.3% (7/30) of these  
44 children were being treated with AED.

#### 50 *Epilepsy control*

51  
52 Of the 103 children with seizures, 62 were already on AEDs at the time of our clinical review.  
53 Polypharmacy with more than two concurrent AED was commonly observed and AED changes were  
54 made for the majority of them. Advised AED changes consisted of dose alteration in 54.8% (34/62)  
55 and medication change in 17.7% (11/62). 27.4% (17/62) were advised to continue treatment already  
56  
57  
58  
59  
60

1  
2  
3 initiated by various providers. We initiated treatment for 39/41 children not previously on AED who  
4 were clinically determined to still be having epileptic seizures; 2/41 only had short seizures once or  
5 twice a year and were not put on AED.  
6  
7  
8  
9

## 10 **Telehealth supported follow up and clinics**

### 11 *Phone follow up*

12 We were able to review 75.8% (78/90) children with epileptic seizures on follow up during the study  
13 period. On follow-up (median 6.0 months), 69.2% (54/78) were taking prescribed medications as  
14 advised. Among them 75.9% (41/54) showed improvement in seizure control (>50% seizure  
15 reduction), including 14 children who became seizure free. 30.8% (24/78) families had discontinued  
16 the advised treatment due to affordability (8/24, 33.3%), excessive drowsiness (7/24, 29.2%),  
17 development of a rash (4/24, 16.7%), no perceived benefit with medication and lack of  
18 understanding behind the use of regular medications (2/24, 8.3%). Three (3/24, 12.5%) children who  
19 discontinued medications were reported to be seizure free. None of the families reported any  
20 adverse effects that led to reported cardiorespiratory compromise, hospital presentation or death.  
21  
22  
23  
24  
25  
26  
27  
28  
29

30 Two children from our cohort died during the follow up period, one due to meningitis and the other  
31 due to a lower respiratory tract infection. Their cause of death was determined by verbal autopsy  
32 conducted as part of a separate study [12].  
33  
34  
35  
36

### 37 *Telemedicine*

38 Five telemedicine clinics undertaken in 2018 contributed to patient follow up and clinical capacity  
39 building. During these clinics 47 patients were seen by a local medical practitioner with internet-  
40 based videoconference support from the pediatric neurologist in Australia. Each clinic was of three  
41 hours duration during which patient interview was undertaken in the same manner as in the focused  
42 epilepsy clinics. Thirty minutes were marked during each clinic for discussion regarding clinical signs,  
43 history taking and AED choice. Clinical details for new patients reviewed during telemedicine clinics  
44 were not included in this cohort.  
45  
46  
47  
48  
49  
50  
51

## 52 **DISCUSSION**

53 Epilepsy is a significant comorbidity in some individuals with CP. Previous studies have described a  
54 prevalence of 15-90% epilepsy in CP cohorts [13,14]. Overall, epilepsy contributes more significantly  
55 to the global burden of disease in resource poor settings as evident from the 2015 Global burden of  
56 disease studies. We found an initial prevalence of epilepsy of 23.4% in our cohort. Interestingly,  
57  
58  
59  
60

1  
2  
3 following reassessment in our clinics, as described, this was revised to 14.3%. Previous studies have  
4 also noted such discrepancy between determination of a clinical diagnosis of epilepsy between  
5 specialist and community-based settings with a misdiagnosis of epilepsy being made in as many as  
6 25% of cases [15]. This has flow on impacts as we noted in terms of incorrect, often excessive use of  
7 medications. Epilepsy poses substantial economic burden on families [16]. When families devote a  
8 significant proportion of their finances, attention, time or all of these towards one aspect of their  
9 child's management, other aspects of care such as physical therapy, nutrition, pain and  
10 musculoskeletal management are likely to be neglected, more so in resource poor settings [17].  
11  
12  
13  
14  
15  
16  
17

18 As demonstrated by recent innovative projects in neighbouring Nepal, education of community level  
19 workers and general medical practitioners can lead to more consistent clinical diagnosis of epilepsy  
20 [18]. In our experience, rationalisation or cessation of medications after focused clinical assessments  
21 led to changes in family finances diverted towards medication use. We envision that the  
22 development of simplified print and multimedia based educational resources for health care workers  
23 and medical practitioners hold the potential to improve epilepsy diagnosis in resource scarce  
24 settings such as our study site.  
25  
26  
27  
28  
29  
30  
31

32 Polypharmacy with more than two concurrent AEDs is unlikely to contribute significantly to seizure  
33 control [19]. In countries like Bangladesh with a mismatch of clinical care practices between urban  
34 and rural areas, the use of less conventional or alternative medications is very likely to be  
35 encountered.  
36  
37  
38  
39

40 AED availability is very limited in rural Bangladesh [20]. Medications need to be purchased by  
41 families and hence, cost per month for AEDs is a significant consideration when choosing  
42 medications for chronic use to ensure good compliance. The cheapest and most readily available  
43 AEDs are phenobarbitone, clobazam and sodium valproate. If a diagnosis of CP is very likely based on  
44 clinical evaluation and history, earlier use of sodium valproate or clobazam in this setting is a viable  
45 option for transitioning from phenobarbitone which is most commonly prescribed in infancy. As  
46 outlined in our methods and Figure 2, AED choice can be rationalized based not only on the seizure  
47 type but also existing comorbidity as some AEDs can help improve comorbid psychiatric symptoms  
48 or sleep disturbance.  
49  
50  
51  
52  
53  
54  
55  
56

57 Our experience highlighted a gap in the recognition and management of prolonged seizures in  
58 settings like ours compared to conventional management in urban and resource rich settings.  
59  
60

1  
2  
3 Benzodiazepines are the mainstay of out of hospital, particularly health worker or parent led  
4 management of prolonged seizures. However, midazolam or lorazepam are not available at all in  
5 rural Bangladesh. Diazepam is only available in glass ampoules through restricted prescriptions in  
6 some pharmacy outlets. In our and wider reported experience caregivers are often reluctant to use  
7 glass ampoules or follow several steps in medication administration to a child at home [21]. Other  
8 readily available benzodiazepines are cheap (clobazam: 0.042 USD per 10 mg tablet and clonazepam:  
9 0.048 USD per 1 mg tablet; prices mid 2018) but there is very little evidence regarding their use in  
10 the setting of prolonged seizures [22,23]. Status epilepticus can significantly add to the burden of  
11 cumulative brain injury and therefore warrants a solution [24]. This may be in the form of a per-  
12 rectal, oral or, alternative routes for delivery of well-established medications for status epilepticus  
13 such as phenobarbitone, valproate or midazolam. Alternatively, the use of medications such as  
14 clonazepam drops via open label trials requires urgent exploration for such settings.

15  
16  
17  
18  
19  
20  
21  
22  
23  
24  
25 Our model has demonstrated that immediate positive impact on epilepsy management and  
26 reduction in burden of care on families can be achieved through structured assessments by medical  
27 and allied personnel who are trained to assess children for epilepsy and use available medications  
28 according to a structured framework. This can be achieved for a population base such as in our study  
29 area with limited personnel and without additional investigation or formalized health care facilities,  
30 though these would be desirable to further improve patient outcomes. We piloted the use of  
31 videoconference-based telemedicine clinics after initial face to face clinics. With some prior training  
32 in the use of a structured clinical approach, this method can be very time-efficient in reviewing  
33 patients led by a non-specialist medical practitioner/community worker and supported by a  
34 specialist. In our experience, this not only provided continuity of clinical support with existing  
35 personnel but also provided an opportunity for continuing professional development and capacity  
36 building. We hope that in the post-COVID era, implementation and incorporation of telemedicine  
37 should be easier and more acceptable to providers, policymakers and the community.

38  
39  
40  
41  
42  
43  
44  
45  
46  
47  
48 We summarize the key barriers identified and proposed or already implemented solutions in Table 1.  
49 Development of multimedia or mobile application-based resources that may simply illustrate clinical  
50 assessment of children with epilepsy, examples of non-epileptic events and emergency seizure  
51 management will provide convenient means for translation of our findings to the wider population  
52 in Bangladesh and, with language translation, to similar resource poor settings across the world.  
53  
54  
55  
56  
57  
58  
59  
60

1  
2  
3 We have engaged with tertiary paediatric neurology centres in Bangladesh to support some families  
4 with requisite investigations or more frequent specialist review. However, this will always be limited  
5 to financial and logistic constraints of rural families.  
6  
7  
8  
9

### 10 **Study limitations**

11 We did not systematically collect baseline investigation information for this cohort as a small  
12 proportion had any previous tests such as electroencephalography (EEG) or neuroimaging. The  
13 clinical diagnosis of seizures and non-epileptic events were not corroborated by investigations as  
14 they were unavailable in this resource limited setting. We had to rely on the clinical impression of a  
15 limited number of observers. Although we utilized standard criteria to assess seizure reduction, the  
16 collection of the follow up data was based on reporting by the primary caregiver which may have  
17 been a source of potential bias.  
18  
19  
20  
21  
22  
23  
24

### 25 **CONCLUSION**

26 Epilepsy is prevalent among children with CP in rural Bangladesh and the various gaps in optimum  
27 epilepsy management are lack regular follow-up, recognition of common seizure types and non-  
28 epileptic seizure mimics, familiarization with commonly available, affordable AED and availability of  
29 guidelines for prolonged seizure management. These gaps are amenable to proposed low cost,  
30 educational interventions. Health care workers can improve epilepsy management with regular  
31 follow-up, education on common seizure types, seizure mimics, use of commonly available,  
32 affordable AED and guidelines for prolonged seizure management.  
33  
34  
35  
36  
37  
38  
39

### 40 **AUTHORS' CONTRIBUTION**

41 All listed authors meet the appropriate authorship criteria, and nobody who qualifies for authorship  
42 has been omitted. GK and SM conceptualized and established this research study. They also  
43 contributed to study design, development of the study materials and overall conduct of the study  
44 supported by TK. SM, TK and MCD were responsible for assessment of study participants and data  
45 collection. SM, GK and MM provided specialist advice in this study. TK, SM and GK completed data  
46 analysis, interpretation of the data and drafted the initial and revised manuscript with input from all  
47 the co-authors. All authors have read and approved the final manuscript.  
48  
49  
50  
51  
52  
53  
54  
55

### 56 **FUNDING STATEMENT**

57 This study has been conducted as part of the BCPR study funded by the Cerebral Palsy Alliance  
58 Research Foundation (PG4314) and through internal funding from CSF Global, Bangladesh. TK is  
59  
60

1  
2  
3 supported by the Cerebral Palsy Alliance Research Foundation (CDG04617, PHD02119). SM is  
4 supported by Cerebral Palsy Alliance Research Foundation Career Development Grant (CDG7916).  
5  
6 The study funders played no role in the design of the study and collection, analysis, interpretation of  
7  
8 data and in the preparation of the manuscript, and in the decision to submit the paper for  
9  
10 publication.

### 11 12 13 **ACKNOWLEDGEMENTS**

14  
15 We would like to acknowledge the CSF Global team in Bangladesh for their cordial support in  
16  
17 implementing this project and supporting the families of children with CP in referrals and access to  
18  
19 services. We also want to acknowledge the primary caregivers of the children with CP and epilepsy  
20  
21 who participated in the study. Their input was invaluable to the design and conduct of this study.

### 22 23 **CONFLICT OF INTEREST DISCLOSURES**

24  
25 The authors declare no competing interests.

### 26 27 28 29 **DATA AVAILABILITY STATEMENT**

30  
31 No additional data are available.  
32  
33  
34  
35  
36  
37  
38  
39  
40  
41  
42  
43  
44  
45  
46  
47  
48  
49  
50  
51  
52  
53  
54  
55  
56  
57  
58  
59  
60

**REFERENCES**

- [1] Bax M, Goldstein M, Rosenbaum P, Leviton A, Paneth N, Dan B, et al. Proposed definition and classification of cerebral palsy, April 2005. *Developmental Medicine & Child Neurology*. 2005;47(8):571-6.
- [2] Mesraoua B, Ali M, Deleu D, Al Hail H, Melikyan G, Haddad N, Alalamy O, Athanasios C, Asadi-Pooya AA. *Epilepsy and Cerebral Palsy*. Neurodevelopment and Neurodevelopmental Disorder 2019 May 8. IntechOpen.
- [3] Singhi P, Jagirdar S, Khandelwal N, Malhi P. Epilepsy in children with cerebral palsy. *Journal of Child Neurology*. 2003;18(3):174-9.
- [4] Khandaker G, Muhit M, Karim T, Smithers-Sheedy H, Novak I, Jones C, et al. Epidemiology of cerebral palsy in Bangladesh: a population-based surveillance study. *Developmental Medicine & Child Neurology*. 2019 May;61(5):601-9.
- [5] National Institute of Population Research and Training (NIPORT), ICF International. *Bangladesh Demographic and Health Survey*. Dhaka, Bangladesh; 2014.
- [6] Ahmed SM, Hossain MA, RajaChowdhury AM, Bhuiya AU. The health workforce crisis in Bangladesh: shortage, inappropriate skill-mix and inequitable distribution. *Human Resources for Health*. 2011;9(1):3.
- [7] Kim JY, Farmer P, Porter ME. Redefining global health-care delivery. *The Lancet*. 2013;382(9897):1060-9.
- [8] Bearden DR. *Pediatric Neurology in Resource-Limited Settings: a Systematic Review*. *Current Pediatrics Reports*. 2018;6(1):34-9.
- [9] Kim JY FP, Porter ME. A global health delivery framework approach to epilepsy care in resource-limited settings. *Journal of the Neurological Sciences*. 2015;358(1-2):263-5.
- [10] Patel P, Baier J, Baranov E, Khurana E, Gambrah-Sampaney C, Johnson A, et al. Health beliefs regarding pediatric cerebral palsy among caregivers in Botswana: A qualitative study. *Child: Care, Health and Development*. 2017;43(6):861-8.
- [11] Fisher RS, Cross JH, French JA, et al. Operational classification of seizure types by the International League Against Epilepsy: Position Paper of the ILAE Commission for Classification and Terminology. *Epilepsia* 2017;58:522–530
- [12] Jahan I, Karim T, Das MC, Muhit M, Mcintyre S, Smithers-Sheedy H, Badawi N, Khandaker G. Mortality in children with cerebral palsy in rural Bangladesh: a population-based surveillance study. *Developmental Medicine & Child Neurology*. 2019 Nov;61(11):1336-43.
- [13] Aicardi J. Epilepsy in Brain-Injured Children. *Developmental Medicine & Child Neurology*. 2010;32(3):191-202.



- 1  
2  
3 [14] Aksu F. Nature and Prognosis of Seizures In Patients With Cerebral Palsy. *Developmental*  
4 *Medicine & Child Neurology*. 2008;32(8):661-8.  
5  
6 [15] National Clinical Guideline Centre. The epilepsies: the diagnosis and management of the  
7 epilepsies in adults and children in primary and secondary care.  
8  
9 <http://www.nice.org.uk/nicemedia/live/13635/57784/57784.pdf> (accessed  
10 March 2021)  
11  
12 [16] Allers K, Essue BM, Hackett ML, Muhunthan J, Anderson CS, Pickles K, Scheibe F, Jan S. The  
13 economic impact of epilepsy: a systematic review. *BMC neurology*. 2015 Dec 1;15(1):245.  
14  
15 [17] Nuri RP, Aldersey HM, Ghahari S. Needs of families of children with cerebral palsy in  
16 Bangladesh: A qualitative study. *Child: Care, Health and Development*. 2018;45(1):36-44.  
17  
18 [18] Rajbhandari H, Joshi S, Malakar S, Paudel P, Jain P, Uppadaya K, et al. Epilepsy field workers,  
19 a smartphone application and telephone telemedicine: Safe and effective epilepsy care in rural  
20 Nepal. *Seizure*. 2019;64:54-8.  
21  
22 [19] Patsalos PN, Perucca E. Clinically important drug interactions in epilepsy: general features  
23 and interactions between antiepileptic drugs. *The Lancet Neurology*. 2003;2(6):347-56.  
24  
25 [20] Hussain ME. Burden of Epilepsy in Bangladesh: Current Approach. *Journal of Current and*  
26 *Advance Medical Research*. 2018;4(1):1-2.  
27  
28 [21] Chiang LM, Wang HS, Shen HH, Deng ST, Tseng CH, Chen YI, Chou ML, Hung PC, Lin KL. Rectal  
29 diazepam solution is as good as rectal administration of intravenous diazepam in the first-aid  
30 cessation of seizures in children with intractable epilepsy. *Pediatrics & Neonatology*. 2011 Feb  
31 1;52(1):30-3.  
32  
33 [22] Shangguan Y, Liao H, Wang X. Clonazepam in the treatment of status epilepticus. *Expert*  
34 *Review of Neurotherapeutics*. 2015;15(7):733-40.  
35  
36 [23] Treiman DM, Meyers PD, Walton NY, Collins JF, Colling C, Rowan AJ, et al. A Comparison of  
37 Four Treatments for Generalized Convulsive Status Epilepticus. *New England Journal of Medicine*.  
38 1998;339(12):792-8.  
39  
40 [24] Kwong KL, Wong SN, So KT. Epilepsy in children with cerebral palsy. *Pediatric Neurology*.  
41 1998;19(1):31-6.  
42  
43  
44  
45  
46  
47  
48  
49  
50  
51  
52  
53  
54  
55  
56  
57  
58  
59  
60

**Table 1:** Barriers to epilepsy control and suggested interventions

| <b>Barriers</b>                                                         | <b>Suggested interventions</b>                                                                                                                                                  |
|-------------------------------------------------------------------------|---------------------------------------------------------------------------------------------------------------------------------------------------------------------------------|
| AED availability                                                        | Selection of locally available medications for management through a structured guideline                                                                                        |
| Lack of skilled personnel for epilepsy management and follow up locally | Capacity building and engagement of local medical practitioners and community health workers<br>Development of multimedia or mobile application-based resources<br>Telemedicine |
| Affordability                                                           | Rationalization of drugs                                                                                                                                                        |
| Poor treatment compliance                                               | Rationalization of drugs<br>Training and engagement of health workers for follow up<br>Caregiver education                                                                      |
| Prolonged seizure management                                            | Development of guideline and resources for management of prolonged seizure for training of local health workers                                                                 |
| Misidentification of non-epileptic episodes as seizures                 | Development of video resources describing seizures and non-epileptic events                                                                                                     |
| Lack of parental understanding regarding epilepsy treatment             | Parent education on epilepsy treatment                                                                                                                                          |

**Figure 1:** Clinical assessment of epilepsy in children with CP in Shahjadpur

**Bangladesh Cerebral Palsy Register**

Population-based surveillance of children with cerebral palsy in Shahjadpur

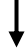

**Dates for epilepsy clinics decided**

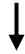

**Children with CP having epilepsy identified from the BCPR cohort**

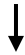

**Families of the children informed of the clinic date and location by phone by community worker**

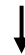

**Epilepsy clinics held at 3 sites in Shahjadpur**

- Structured proforma populated and anthropometric measurement taken by community workers  
10 minutes per patient
- Clinical review by local medical practitioners overseen by pediatric neurologist from Australia and review of relevant medical records  
15 minutes per patient with interpretation
- Medications explained by community worker  
5 – 10 minutes per patient

**Figure 2:** Suggested considerations in choice of medications for seizures and comorbidity in children with cerebral palsy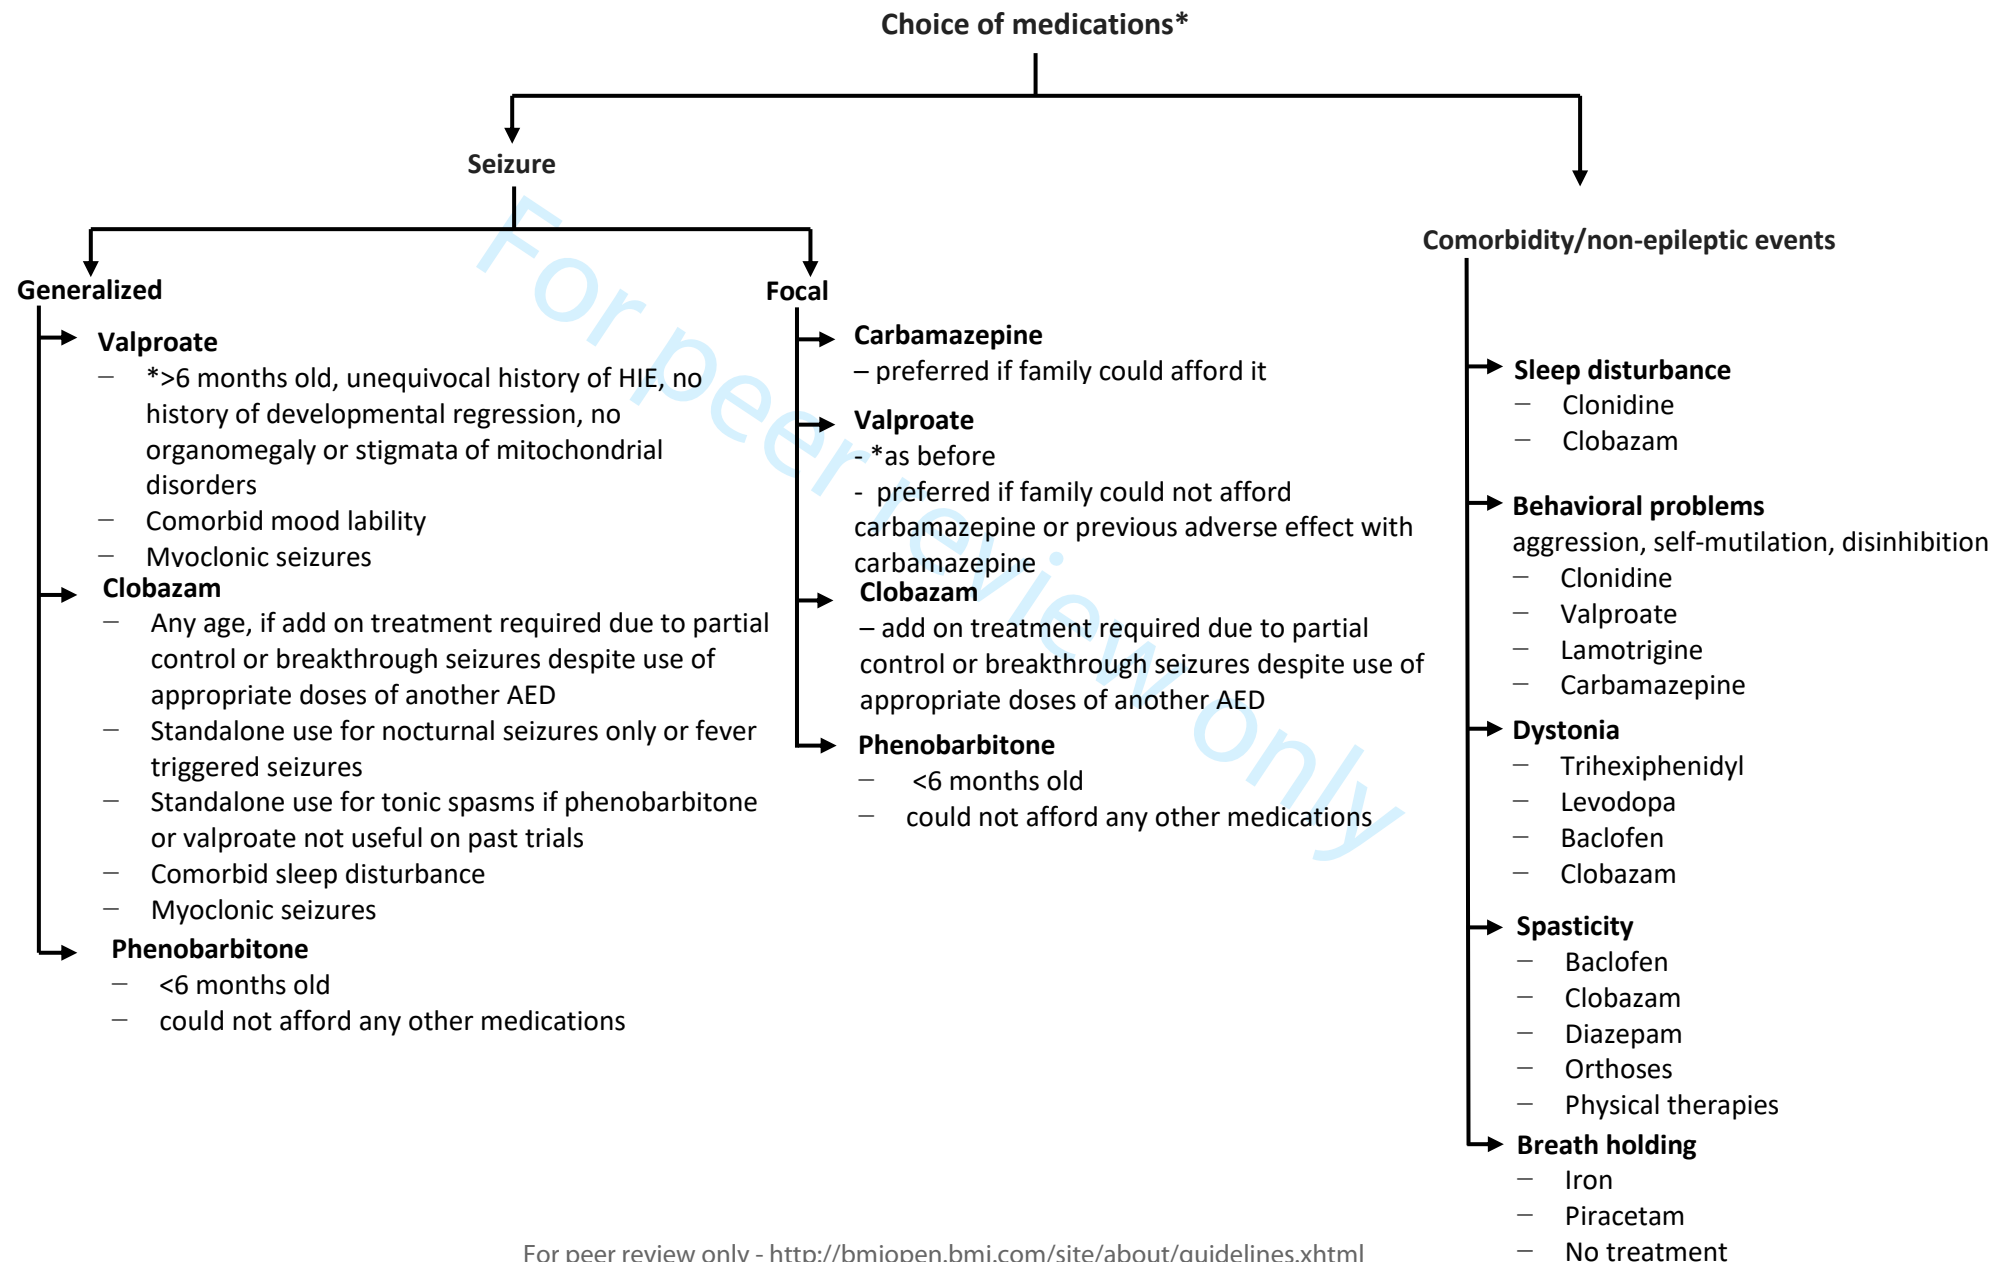For peer review only - <http://bmjopen.bmj.com/site/about/guidelines.xhtml>

\*All medications are listed in order of preference for management

**Figure 3: Study diagram**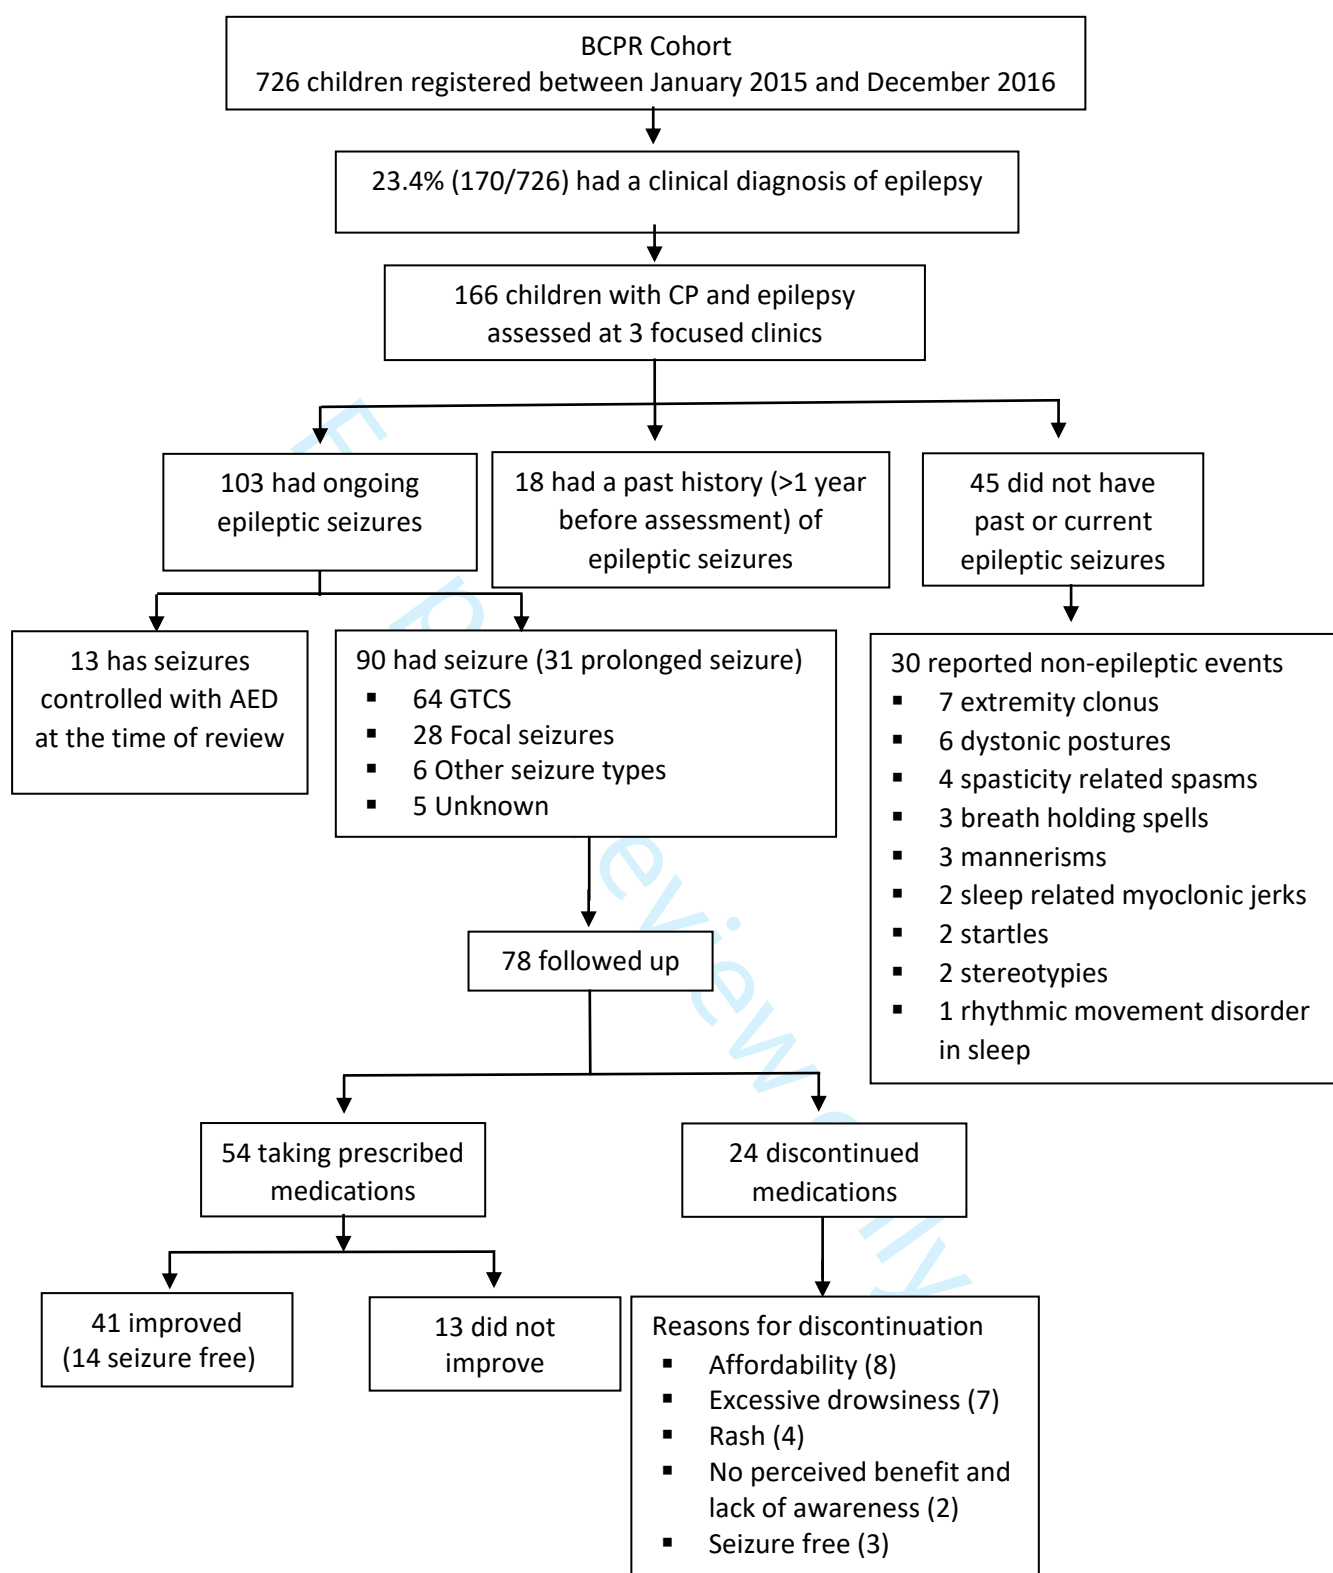

**Appendix A:** Clinic proforma used during focused epilepsy clinics

|                                                                                                                                                                                                                                                                                           |                                                                      |                            |
|-------------------------------------------------------------------------------------------------------------------------------------------------------------------------------------------------------------------------------------------------------------------------------------------|----------------------------------------------------------------------|----------------------------|
| <b>ASSESSMENT DETAILS</b>                                                                                                                                                                                                                                                                 |                                                                      |                            |
| <b>ID NUMBER:</b>                                                                                                                                                                                                                                                                         | <b>SERIAL NUMBER:</b>                                                |                            |
| <b>ASSESSMENT LOCATION:</b>                                                                                                                                                                                                                                                               | <b>ASSESSMENT DATE:</b> DD / MM / YYYY                               |                            |
| <b>CHILD'S DETAILS</b>                                                                                                                                                                                                                                                                    |                                                                      |                            |
| <b>NAME:</b>                                                                                                                                                                                                                                                                              | <b>GENDER:</b> <input type="checkbox"/> M <input type="checkbox"/> F | <b>DOB:</b> DD / MM / YYYY |
| <b>HEAD CIRCUMFERENCE (cm):</b>                                                                                                                                                                                                                                                           | <b>WEIGHT (kg):</b>                                                  | <b>LENGTH/HEIGHT (cm):</b> |
| <b>FATHER'S DETAILS</b>                                                                                                                                                                                                                                                                   |                                                                      |                            |
| <b>NAME:</b>                                                                                                                                                                                                                                                                              | <b>DOB:</b> DD / MM / YYYY                                           | <b>OCCUPATION:</b>         |
| <b>EDUCATION</b>                                                                                                                                                                                                                                                                          |                                                                      |                            |
| <input type="checkbox"/> Illiterate <input type="checkbox"/> Primary <input type="checkbox"/> Secondary <input type="checkbox"/> Higher secondary <input type="checkbox"/> Graduation <input type="checkbox"/> Post-graduation <input type="checkbox"/> Diploma/other trade qualification |                                                                      |                            |
| <b>MOTHER'S DETAILS</b>                                                                                                                                                                                                                                                                   |                                                                      |                            |
| <b>NAME:</b>                                                                                                                                                                                                                                                                              | <b>DOB:</b> DD / MM / YYYY                                           | <b>OCCUPATION:</b>         |
| <b>EDUCATION</b>                                                                                                                                                                                                                                                                          |                                                                      |                            |
| <input type="checkbox"/> Illiterate <input type="checkbox"/> Primary <input type="checkbox"/> Secondary <input type="checkbox"/> Higher secondary <input type="checkbox"/> Graduation <input type="checkbox"/> Post-graduation <input type="checkbox"/> Diploma/other trade qualification |                                                                      |                            |
| <b>CONTACT DETAILS</b>                                                                                                                                                                                                                                                                    |                                                                      |                            |
| <b>DISTRICT:</b>                                                                                                                                                                                                                                                                          | <b>SUB-DISTRICT:</b>                                                 |                            |
| <b>UNION:</b>                                                                                                                                                                                                                                                                             | <b>VILLAGE:</b>                                                      |                            |
| <b>POST CODE:</b>                                                                                                                                                                                                                                                                         | <b>PHONE NO.:</b>                                                    |                            |
| <b>TYPE OF CASE (select one):</b> <input type="checkbox"/> New <input type="checkbox"/> Follow-Up                                                                                                                                                                                         |                                                                      |                            |
| <b>SEIZURE CONTROL:</b> <input type="checkbox"/> Same <input type="checkbox"/> Better <input type="checkbox"/> Worse                                                                                                                                                                      |                                                                      |                            |
| <b>SEIZURE FREE ON TREATMENT:</b> <input type="checkbox"/> Yes <input type="checkbox"/> No                                                                                                                                                                                                |                                                                      |                            |
| <b>COMPLIANT:</b> <input type="checkbox"/> Yes <input type="checkbox"/> No                                                                                                                                                                                                                | <b>IF NO, REASON FOR NON-COMPLIANCE:</b>                             |                            |
| <b>REASON FOR POOR SEIZURE CONTROL:</b>                                                                                                                                                                                                                                                   |                                                                      |                            |
| <b>MAIN CONCERN:</b>                                                                                                                                                                                                                                                                      |                                                                      |                            |
| <b>HISTORY AND EXAMINATION FINDINGS</b>                                                                                                                                                                                                                                                   |                                                                      |                            |
| <b>BIRTH HISTORY:</b>                                                                                                                                                                                                                                                                     |                                                                      |                            |
| <b>SEIZURE</b>                                                                                                                                                                                                                                                                            |                                                                      |                            |
| <b>FIRST:</b>                                                                                                                                                                                                                                                                             | <b>LAST:</b>                                                         |                            |
| <b>HISTORY OF PROLONGED SEIZURE (&gt; 5 mins):</b> <input type="checkbox"/> Yes <input type="checkbox"/> No                                                                                                                                                                               |                                                                      |                            |
| <b>CURRENT FREQUENCY:</b> _____ times per <input type="checkbox"/> day <input type="checkbox"/> week <input type="checkbox"/> month <input type="checkbox"/> year                                                                                                                         |                                                                      |                            |
| <b>TYPE:</b>                                                                                                                                                                                                                                                                              |                                                                      |                            |
| <b>DURATION OF SEIZURE:</b>                                                                                                                                                                                                                                                               | <b>DESCRIPTION:</b>                                                  |                            |
| <b>PREVIOUS MEDICATION &amp; INVESTIGATION</b>                                                                                                                                                                                                                                            |                                                                      |                            |

**Appendix B: Guideline for drug choice at clinics****Table of Contents**

|                                                             |          |
|-------------------------------------------------------------|----------|
| <b>MEDICATIONS FOR SEIZURE MANAGEMENT</b> .....             | <b>4</b> |
| <u>Phenobarbitone</u> .....                                 | <b>4</b> |
| <u>Dose range</u> .....                                     | 4        |
| <u>Seizure types useful for</u> .....                       | 4        |
| <u>Adverse effects</u> .....                                | 4        |
| <u>Comment</u> .....                                        | 4        |
| <u>Sodium Valproate</u> .....                               | <b>4</b> |
| <u>Dose Range</u> .....                                     | 4        |
| <u>Seizure types useful for</u> .....                       | 4        |
| <u>Adverse effects</u> .....                                | 4        |
| <u>Comment</u> .....                                        | 4        |
| <u>Clobazam</u> .....                                       | <b>5</b> |
| <u>Dose Range</u> .....                                     | 5        |
| <u>Seizure types useful for</u> .....                       | 5        |
| <u>Adverse effects</u> .....                                | 5        |
| <u>Comment</u> .....                                        | 5        |
| <u>Nitrazepam</u> .....                                     | <b>5</b> |
| <u>Dose Range</u> .....                                     | 5        |
| <u>Seizure types useful for</u> .....                       | 5        |
| <u>Adverse effects</u> .....                                | 5        |
| <u>Comment</u> .....                                        | 6        |
| <u>Carbamazepine</u> .....                                  | <b>6</b> |
| <u>Dose Range</u> .....                                     | 6        |
| <u>Seizure types useful for</u> .....                       | 6        |
| <u>Adverse effects</u> .....                                | 6        |
| <u>Comment</u> .....                                        | 6        |
| <b>MEDICATIONS FOR DYSTONIA/SPASTICITY MANAGEMENT</b> ..... | <b>6</b> |
| <u>Trihexiphenidyl/Benzhexol</u> .....                      | <b>6</b> |
| <u>Dose Range</u> .....                                     | 6        |
| <u>Symptoms useful for</u> .....                            | 6        |
| <u>Adverse effects</u> .....                                | 6        |
| <u>Comment</u> .....                                        | 7        |
| <u>Baclofen</u> .....                                       | <b>7</b> |
| <u>Dose Range</u> .....                                     | 7        |
| <u>Start Symptoms useful for</u> .....                      | 7        |
| <u>Adverse effects</u> .....                                | 7        |
| <u>Comment</u> .....                                        | 7        |
| <u>Levodopa/Carbidopa</u> .....                             | <b>7</b> |
| <u>Dose Range</u> .....                                     | 7        |
| <u>Symptoms useful for</u> .....                            | 7        |
| <u>Adverse effects</u> .....                                | 8        |
| <u>Comment</u> .....                                        | 8        |
| <b>MEDICATIONS FOR BEHAVIOUR MANAGEMENT</b> .....           | <b>8</b> |
| <u>Clonidine</u> .....                                      | <b>8</b> |
| <u>Dose Range</u> .....                                     | 8        |
| <u>Start Symptoms useful for</u> .....                      | 8        |

1  
2  
3  
4  
5  
6  
7  
8  
9  
10  
11  
12  
13  
14  
15  
16  
17  
18  
19  
20  
21  
22  
23  
24  
25  
26  
27  
28  
29  
30  
31  
32  
33  
34  
35  
36  
37  
38  
39  
40  
41  
42  
43  
44  
45  
46  
47  
48  
49  
50  
51  
52  
53  
54  
55  
56  
57  
58  
59  
60

|                                                                   |          |
|-------------------------------------------------------------------|----------|
| <a href="#">Adverse effects</a> .....                             | 8        |
| <a href="#">Comment</a> .....                                     | 8        |
| <a href="#">Risperidone</a> .....                                 | 8        |
| <a href="#">Dose Range</a> .....                                  | 8        |
| <a href="#">Symptoms useful for</a> .....                         | 8        |
| <a href="#">Adverse effects</a> .....                             | 8        |
| <a href="#">Comment</a> .....                                     | 9        |
| <b><a href="#">MEDICATIONS FOR EMERGENCY MANAGEMENT</a></b> ..... | <b>9</b> |
| <a href="#">Diazepam</a> .....                                    | 9        |
| <a href="#">Dose Range</a> .....                                  | 9        |
| <a href="#">Symptoms useful for</a> .....                         | 9        |
| <a href="#">Adverse effects</a> .....                             | 9        |
| <a href="#">Comment</a> .....                                     | 9        |
| <b><a href="#">REFERENCES</a></b> .....                           | <b>9</b> |

For peer review only



## MEDICATIONS FOR SEIZURE MANAGEMENT

### *PHENOBARBITONE*

#### **Dose range**

- 1–6 mg/kg daily in 1 or 2 doses; start at the lower end of range and increase slowly if required.

#### **Seizure types useful for**

- For generalized seizures and focal seizures.
- Recurrent febrile seizures
- Neonatal seizures
- Less likely to help blank staring “absence” seizures

#### **Adverse effects**

- Allergic rash, rarely can cause extreme hypersensitivity reaction
- Hyperactivity
- Sedation

#### **Comment**

- Generally, a good medication to continue unless it is not working or the side effects are not tolerable
- Do not stop suddenly and wean over several weeks if patient has been on it for more than 3 months

### *SODIUM VALPROATE*

#### **Dose Range**

- 20–40 mg/kg daily in 2 divided doses; start at 5-10 mg/kg/day and increase slowly to 20 mg/kg/day. Then increase further if required.

#### **Seizure types useful for**

- For all seizure types

#### **Adverse effects**

- Hyperactivity
- Liver dysfunction
- Caution with use in children with developmental delay less than two years or older who are likely to not have true CP. Valproate can cause fatal liver dysfunction in those with a history of mitochondrial disorders. This is suggested by a history of developmental regression eg. A child who was able to sit before can no longer do so.

#### **Comment**

- Valproate is likely to work for most seizure types and cause less sedation than phenobarbitone
- Valproate works synergistically with clobazam and lamotrigine.
- Lamotrigine should be introduced very cautiously if someone is already on valproate

**CLOBAZAM****Dose Range**

- Start at 1-2 mg/dose once a day. Can increase as required to
  - 2.5-5 mg BD in children <2 years
  - 5-10 mg BD in children 2-10 years
  - 10 mg TDS in older children
  - maintenance 0.3-1 mg/kg/day in 2 divided doses
- The above doses are a guide and higher doses can be used in younger children if tolerated and if thought to be beneficial for seizure control

**Seizure types useful for**

- For all seizure types
- Also helpful for dystonia management in some cases

**Adverse effects**

- Sedation
- Hyperactivity
- Hallucinations
- Drooling

**Comment**

- Useful monotherapy or add on medication
- Start at small doses like 1 mg BD and grade up
- Can crush tablet and suspend in water to make up small doses if liquid not available
- If difficult for family to understand use quarter tablet / half tablet instead of dissolving
- Wean very slowly similar to phenobarbitone if patient has been taking Clobazam for more than 3 months
- Children can sometimes get used to benzodiazepines. If seizures break through after a few months of good control, then consider swapping over to another benzodiazepine like Nitrazepam.

**NITRAZEPAM****Dose Range**

- Start at 1 month – 2 years: 0.25mg/kg twice daily, up to 0.5mg/kg twice daily
- The above doses are a guide and higher doses can be used in younger children if tolerated and if thought to be beneficial for seizure control

**Seizure types useful for**

- For all seizure types
- Infantile spasms

**Adverse effects**

- Sedation
  - Drooling

**Comment**

- Useful monotherapy or add on medication
- Start at small doses like and grade up
- Wean very slowly similar to phenobarbitone if patient has been taking Nitrazepam for more than 3 months
- Children can sometimes get used to benzodiazepines. If seizures break through after a few months of good control, then consider swapping over to another benzodiazepine like Clobazam.

**CARBAMAZEPINE****Dose Range**

- 10–20 mg/kg daily in 2-3 divided doses; start at 2.5-5 mg/kg/day and increase slowly to 10 mg/kg/day. Then increase further if required. Some patients can respond to low doses 5-10 mg/kg/day and can be maintained on these doses without further increasing unless required

**Seizure types useful for**

- Focal seizures only
- Avoid for generalized, absence and febrile seizures

**Adverse effects**

- Hyperactivity
- Liver dysfunction

**Comment**

- Useful drug for focal seizures, e.g. With hemiplegic CP

**MEDICATIONS FOR DYSTONIA/SPASTICITY MANAGEMENT****TRIHENIPHENIDYL/BENZHEXOL****Dose Range**

- Start at 0.25 mg once a day and gradually increase to 0.25 mg tds.
- If tolerated, can trial up to 2 mg – 4 mg tds
- In older children, higher doses can be used if benefit is noted

**Symptoms useful for**

- Mainly for dystonia management. Can also help drooling due to its anticholinergic properties

**Adverse effects**

- Dry mouth, eyes
- Constipation
- Confusion
- Double vision

- Irritability

#### Comment

- About 25-50% efficacy for dystonia management if side effects are not a problem. Some children can benefit remarkably more
- Avoid other anticholinergic medications or if any of the adverse effects are already a clinical problem
- If not benefit after maximum doses for 3-4 weeks, then discontinue as delayed benefit is unlikely to occur.

### **BACLOFEN**

#### Dose Range

- **2-7 y** -10-40 mg/day divided in three to four doses/day. Start: 2.5-5 mg twice a day, may increase by 5-15 mg/day every 3-4 days, Max: 40 mg/day.
- **8-11 y** - Dose: 10-60 mg/day divided in three to four doses/day. Start: 2.5-5 mg twice a day, may increase by 5-15 mg/day every 3-4 days; Max: 60 mg/day.
- **12 y and older** - Dose: 20-80 mg/day PO divided in three to four doses/day. Start: 5 mg twice a day, may increase by 15 mg/day every 2-3 days; Max: 80 mg/day.

#### Start Symptoms useful for

- Mainly for spasticity management.

#### Adverse effects

- Hypotonia
- Drooling
- Sedation

#### Comment

- Baclofen is a good medication for high tone which is due to spasticity
- It is not so good when there is dominant or mixed dystonia
- Relatively high doses may be needed in some patients making side effects intolerable, these have to be balanced with dose
- Other sedative medications will add to sedative effects and drooling – benzodiazepines, phenobarbitone
- Taper and stop slowly over few weeks if patient has been taking Baclofen for more than 3 months.

### **LEVODOPA/CARBIDOPA**

#### Dose Range

- 1-4 mg/kg/day (levodopa component). Start slowly at 1 mg/kg/day divided in 2 doses and increase to target 4 mg/kg/day in 3 divided doses.
- Can increase further if focal but clear benefit.

#### Symptoms useful for

- Dystonia management
- Can be very helpful when dystonia shows a trend of worsening as the day progresses or is exercise induced

**Adverse effects**

- Nausea

**Comment**

- About 25% efficacy for dystonia management in cerebral palsy but a safe drug to try
- Very useful in genetic dopamine responsive dystonia which can mimic CP but is rare.
- Some preparations are available as Levodopa/Benserazide. Dose guide is same for levodopa component

**MEDICATIONS FOR BEHAVIOUR MANAGEMENT****CLONIDINE****Dose Range**

- Start at 25 micrograms at night for sleep management
- Can increase to 25-100 microgram three times a day for behavior management

**Start Symptoms useful for**

- Management of hyperactive or aggressive behavior. e.g. biting, inattentive in school, disturbs other children, fidgety, can't sit still (these symptoms have to be sufficiently severe to be disruptive to daily home or school life to be considered for treatment)
- Also helpful for episodic management of severe dystonia in patients who get periodic worsening. Doses up to 100 micrograms 4-6 times per day can be helpful for short bursts of 3-4 days. Then wean back to baseline doses or stop

**Adverse effects**

- Sedation
- Sometimes postural dizziness due to postural hypotension – more likely at lower doses

**Comment**

- Wean slowly over a week if patient has been on clonidine for more than 3 months
- Average efficacy for ADHD, stimulants are better

**RISPERIDONE****Dose Range**

- 0.25mg – 5 mg/day in children. Try to manage on least efficacious dose

**Symptoms useful for**

- Management of hyperactive or aggressive behaviour.

**Adverse effects**

- Increased appetite
- Weight gain
- Metabolic disturbance – hyperlipidemia after years of use
- Extrapyramidal effects like rigidity

**Comment**

- Try clonidine first
- Can be quite useful if behavioral issues are really disruptive for daily life.

**MEDICATIONS FOR EMERGENCY MANAGEMENT****DIAZEPAM****Dose Range**

- 0.5 mg/kg <6 y/o; 0.3mg/kg 6-11 y/o; 0.2mg/kg >11y/o

**Symptoms useful for**

- Management of prolonged seizures >5 min at home.

**Adverse effects**

- Sedation
- Respiratory depression and arrest
- Local injury

**Comment**

- Only prescribe if family have received education on use and understand the administration process
- If a child is having a seizure in which he/she is convulsing or is unconscious, it is important to follow simple first aid measures ie. protection from injury, positioning on their side to assist breathing.
- Materials needed
  - a 25ml bottle of diazepam mixed with a stabilizing solution, containing 1mg of diazepam in each 1ml (or alternative concentration)
  - a reusable 10ml syringe
  - a reusable soft plastic tube to attach to the syringe for drawing up and injecting the diazepam
  - a sachet of lubricant jelly

**REFERENCES**

- Australian Medicines Handbook
- MIMS Australia
- Epocrates
- [www.rch.org.au](http://www.rch.org.au)
- [www.dhs.winsconsin.gov](http://www.dhs.winsconsin.gov)

**Appendix C: Follow up questionnaire**

|                      |  |           |                |                  |                                                               |
|----------------------|--|-----------|----------------|------------------|---------------------------------------------------------------|
| Child's Name:        |  |           |                | Gender:          | <input type="checkbox"/> Male <input type="checkbox"/> Female |
| Weight in kg:        |  | Phone No: |                | DOB:             | DD/MM/YYYY                                                    |
| Mother's Name:       |  |           | Father's Name: |                  |                                                               |
| Assessment Location: |  |           |                | Assessment Date: | DD/MM/YYYY                                                    |

**Check before phone call/follow up clinic:**

- Medications and doses the child is on  Was there a change made in the last clinic

**Phone Call: ☎****1. Is your child taking the prescribed medication regularly?**

- No, is your child taking any other medication?  Yes → Fill up table below  No → Go to 3  
 Yes, (Fill up table below) Has there been any improvements?  Yes → Go to 2  No → Go to 2

| Name of Medication                                                                                                                                 | Formulation                                                       | Dose                                                                                   | Daily Dose Frequency                                                                                        |
|----------------------------------------------------------------------------------------------------------------------------------------------------|-------------------------------------------------------------------|----------------------------------------------------------------------------------------|-------------------------------------------------------------------------------------------------------------|
| <input type="checkbox"/> Valproic acid<br>[Valex/Epilim/Epilim/Valpro]                                                                             | <input type="checkbox"/> Syrup<br><input type="checkbox"/> Tablet | <input type="checkbox"/> ___ ml/___ spoon<br><input type="checkbox"/> ___ mg, ___ tabs | <input type="checkbox"/> 1 <input type="checkbox"/> 2 <input type="checkbox"/> 3 <input type="checkbox"/> 4 |
| <input type="checkbox"/> Phenobarbitone<br>[Barbit/Berdinal/Emer/Epinal/Pheno/Phenoba/Phenoson]                                                    | <input type="checkbox"/> Syrup<br><input type="checkbox"/> Tablet | <input type="checkbox"/> ___ ml/___ spoon<br><input type="checkbox"/> ___ mg, ___ tabs | <input type="checkbox"/> 1 <input type="checkbox"/> 2 <input type="checkbox"/> 3 <input type="checkbox"/> 4 |
| <input type="checkbox"/> Epinephrine<br>[Adrinor/Adrenaline/Adrin]                                                                                 | <input type="checkbox"/> Injection<br><input type="checkbox"/> IV | <input type="checkbox"/> ___ ml<br><input type="checkbox"/> ___ mg                     | <input type="checkbox"/> 1 <input type="checkbox"/> 2 <input type="checkbox"/> 3 <input type="checkbox"/> 4 |
| <input type="checkbox"/> Benzodiazepine<br>[Clonazepam/Clobazam/Alsiium/Clob/Clobam/Epson/<br>Frisium /Epiclon/Epnil/Leptic/Myotril/Rivotril/Rivo] | <input type="checkbox"/> Syrup<br><input type="checkbox"/> Tablet | <input type="checkbox"/> ___ ml/___ spoon<br><input type="checkbox"/> ___ mg, ___ tabs | <input type="checkbox"/> 1 <input type="checkbox"/> 2 <input type="checkbox"/> 3 <input type="checkbox"/> 4 |
| <input type="checkbox"/> Clonidine<br>[Catapres 0.1/Clonipres 0.1]                                                                                 | <input type="checkbox"/> Syrup<br><input type="checkbox"/> Tablet | <input type="checkbox"/> ___ ml/___ spoon<br><input type="checkbox"/> ___ mg, ___ tab  | <input type="checkbox"/> 1 <input type="checkbox"/> 2 <input type="checkbox"/> 3 <input type="checkbox"/> 4 |
| <input type="checkbox"/> Piracetam<br>[Neurolep/Neuratam/Piratam/Juvain/Piramax]                                                                   | <input type="checkbox"/> Syrup<br><input type="checkbox"/> Tablet | <input type="checkbox"/> ___ ml/___ spoon<br><input type="checkbox"/> ___ mg, ___ tabs | <input type="checkbox"/> 1 <input type="checkbox"/> 2 <input type="checkbox"/> 3 <input type="checkbox"/> 4 |
| <input type="checkbox"/> Baclofen<br>[Flexifen/Bacofen/Mylofen/Axant/Beclovan]                                                                     | <input type="checkbox"/> Syrup<br><input type="checkbox"/> Tablet | <input type="checkbox"/> ___ ml/___ spoon<br><input type="checkbox"/> ___ mg, ___ tabs | <input type="checkbox"/> 1 <input type="checkbox"/> 2 <input type="checkbox"/> 3 <input type="checkbox"/> 4 |
| <input type="checkbox"/> Trihexyphenidyl<br>[Hexinor/Trihexy]                                                                                      | <input type="checkbox"/> Syrup<br><input type="checkbox"/> Tablet | <input type="checkbox"/> ___ ml/___ spoon<br><input type="checkbox"/> ___ mg, ___ tabs | <input type="checkbox"/> 1 <input type="checkbox"/> 2 <input type="checkbox"/> 3 <input type="checkbox"/> 4 |
| <input type="checkbox"/> Other(write)                                                                                                              | <input type="checkbox"/> Syrup<br><input type="checkbox"/> Tablet | <input type="checkbox"/> ___ ml/___ spoon<br><input type="checkbox"/> ___ mg, ___ tabs | <input type="checkbox"/> 1 <input type="checkbox"/> 2 <input type="checkbox"/> 3 <input type="checkbox"/> 4 |

**2. Is your child seizure free at current dose?**

- Yes → End  
 No, Frequency of seizure: \_\_\_\_\_ per day / week / month / year  
Average duration of seizure \_\_\_\_\_ minutes/hours

For those **not taking any medicine now:****3. Has the medicine caused any problem?  Yes → Fill up table below and end.  No → Go to 4.**

| Problem                                                                | Immediate action on the phone                   |
|------------------------------------------------------------------------|-------------------------------------------------|
| <input type="checkbox"/> Extensive rash developed on medication        | Stop the medication and need to review urgently |
| <input type="checkbox"/> Child too drowsy to feed safely on medication | Reduce to older dose/previous medication        |
| <input type="checkbox"/> Other Problem:                                |                                                 |

**4. Specify any other reason for not taking prescribed medication regularly:**

\_\_\_\_\_

## STROBE Statement—checklist of items that should be included in reports of observational studies

|                              | Item No | Recommendation                                                                                                                                                                                                                                                                                                                                                                                                                                                         | Page No |
|------------------------------|---------|------------------------------------------------------------------------------------------------------------------------------------------------------------------------------------------------------------------------------------------------------------------------------------------------------------------------------------------------------------------------------------------------------------------------------------------------------------------------|---------|
| <b>Title and abstract</b>    | 1       | (a) Indicate the study's design with a commonly used term in the title or the abstract                                                                                                                                                                                                                                                                                                                                                                                 | 1       |
|                              |         | (b) Provide in the abstract an informative and balanced summary of what was done and what was found                                                                                                                                                                                                                                                                                                                                                                    | 2       |
| <b>Introduction</b>          |         |                                                                                                                                                                                                                                                                                                                                                                                                                                                                        |         |
| Background/rationale         | 2       | Explain the scientific background and rationale for the investigation being reported                                                                                                                                                                                                                                                                                                                                                                                   | 4       |
| Objectives                   | 3       | State specific objectives, including any prespecified hypotheses                                                                                                                                                                                                                                                                                                                                                                                                       | 4       |
| <b>Methods</b>               |         |                                                                                                                                                                                                                                                                                                                                                                                                                                                                        |         |
| Study design                 | 4       | Present key elements of study design early in the paper                                                                                                                                                                                                                                                                                                                                                                                                                | 4-6     |
| Setting                      | 5       | Describe the setting, locations, and relevant dates, including periods of recruitment, exposure, follow-up, and data collection                                                                                                                                                                                                                                                                                                                                        | 4-6     |
| Participants                 | 6       | (a) <i>Cohort study</i> —Give the eligibility criteria, and the sources and methods of selection of participants. Describe methods of follow-up<br><i>Case-control study</i> —Give the eligibility criteria, and the sources and methods of case ascertainment and control selection. Give the rationale for the choice of cases and controls<br><i>Cross-sectional study</i> —Give the eligibility criteria, and the sources and methods of selection of participants | 4-5     |
|                              |         | (b) <i>Cohort study</i> —For matched studies, give matching criteria and number of exposed and unexposed<br><i>Case-control study</i> —For matched studies, give matching criteria and the number of controls per case                                                                                                                                                                                                                                                 | NA      |
| Variables                    | 7       | Clearly define all outcomes, exposures, predictors, potential confounders, and effect modifiers. Give diagnostic criteria, if applicable                                                                                                                                                                                                                                                                                                                               | 4-6     |
| Data sources/<br>measurement | 8*      | For each variable of interest, give sources of data and details of methods of assessment (measurement). Describe comparability of assessment methods if there is more than one group                                                                                                                                                                                                                                                                                   | 4-6     |
| Bias                         | 9       | Describe any efforts to address potential sources of bias                                                                                                                                                                                                                                                                                                                                                                                                              | 4-5     |
| Study size                   | 10      | Explain how the study size was arrived at                                                                                                                                                                                                                                                                                                                                                                                                                              | 4-5     |
| Quantitative variables       | 11      | Explain how quantitative variables were handled in the analyses. If applicable, describe which groupings were chosen and why                                                                                                                                                                                                                                                                                                                                           | 6       |
| Statistical methods          | 12      | (a) Describe all statistical methods, including those used to control for confounding                                                                                                                                                                                                                                                                                                                                                                                  | 6       |
|                              |         | (b) Describe any methods used to examine subgroups and interactions                                                                                                                                                                                                                                                                                                                                                                                                    | NA      |
|                              |         | (c) Explain how missing data were addressed                                                                                                                                                                                                                                                                                                                                                                                                                            | NA      |
|                              |         | (d) <i>Cohort study</i> —If applicable, explain how loss to follow-up was addressed<br><i>Case-control study</i> —If applicable, explain how matching of cases and controls was addressed<br><i>Cross-sectional study</i> —If applicable, describe analytical methods taking account of sampling strategy                                                                                                                                                              | 5       |
|                              |         | (e) Describe any sensitivity analyses                                                                                                                                                                                                                                                                                                                                                                                                                                  | NA      |

Continued on next page



1  
2  
3  
4  
5  
6  
7  
8  
9  
10  
11  
12  
13  
14  
15  
16  
17  
18  
19  
20  
21  
22  
23  
24  
25  
26  
27  
28  
29  
30  
31  
32  
33  
34  
35  
36  
37  
38  
39  
40  
41  
42  
43  
44  
45  
46  
47  
48  
49  
50  
51  
52  
53  
54  
55  
56  
57  
58  
59  
60**Results**

|                  |     |                                                                                                                                                                                                              |          |
|------------------|-----|--------------------------------------------------------------------------------------------------------------------------------------------------------------------------------------------------------------|----------|
| Participants     | 13* | (a) Report numbers of individuals at each stage of study—eg numbers potentially eligible, examined for eligibility, confirmed eligible, included in the study, completing follow-up, and analysed            | 4-6      |
|                  |     | (b) Give reasons for non-participation at each stage                                                                                                                                                         | Figure 3 |
|                  |     | (c) Consider use of a flow diagram                                                                                                                                                                           | Figure 1 |
| Descriptive data | 14* | (a) Give characteristics of study participants (eg demographic, clinical, social) and information on exposures and potential confounders                                                                     | 6        |
|                  |     | (b) Indicate number of participants with missing data for each variable of interest                                                                                                                          | Figure 3 |
|                  |     | (c) <i>Cohort study</i> —Summarise follow-up time (eg, average and total amount)                                                                                                                             |          |
| Outcome data     | 15* | <i>Cohort study</i> —Report numbers of outcome events or summary measures over time                                                                                                                          | 6-8      |
|                  |     | <i>Case-control study</i> —Report numbers in each exposure category, or summary measures of exposure                                                                                                         | NA       |
|                  |     | <i>Cross-sectional study</i> —Report numbers of outcome events or summary measures                                                                                                                           | NA       |
| Main results     | 16  | (a) Give unadjusted estimates and, if applicable, confounder-adjusted estimates and their precision (eg, 95% confidence interval). Make clear which confounders were adjusted for and why they were included | NA       |
|                  |     | (b) Report category boundaries when continuous variables were categorized                                                                                                                                    | NA       |
|                  |     | (c) If relevant, consider translating estimates of relative risk into absolute risk for a meaningful time period                                                                                             | NA       |
| Other analyses   | 17  | Report other analyses done—eg analyses of subgroups and interactions, and sensitivity analyses                                                                                                               | NA       |

**Discussion**

|                  |    |                                                                                                                                                                            |      |
|------------------|----|----------------------------------------------------------------------------------------------------------------------------------------------------------------------------|------|
| Key results      | 18 | Summarise key results with reference to study objectives                                                                                                                   | 8-11 |
| Limitations      | 19 | Discuss limitations of the study, taking into account sources of potential bias or imprecision. Discuss both direction and magnitude of any potential bias                 | 11   |
| Interpretation   | 20 | Give a cautious overall interpretation of results considering objectives, limitations, multiplicity of analyses, results from similar studies, and other relevant evidence | 8-11 |
| Generalisability | 21 | Discuss the generalisability (external validity) of the study results                                                                                                      | 8-11 |

**Other information**

|         |    |                                                                                                                                                               |       |
|---------|----|---------------------------------------------------------------------------------------------------------------------------------------------------------------|-------|
| Funding | 22 | Give the source of funding and the role of the funders for the present study and, if applicable, for the original study on which the present article is based | 11-12 |
|---------|----|---------------------------------------------------------------------------------------------------------------------------------------------------------------|-------|

\*Give information separately for cases and controls in case-control studies and, if applicable, for exposed and unexposed groups in cohort and cross-sectional studies.

**Note:** An Explanation and Elaboration article discusses each checklist item and gives methodological background and published examples of transparent reporting. The STROBE checklist is best used in conjunction with this article (freely available on the Web sites of PLoS Medicine at <http://www.plosmedicine.org/>, Annals of Internal Medicine at <http://www.annals.org/>, and Epidemiology at <http://www.epidem.com/>). Information on the STROBE Initiative is available at [www.strobe-statement.org](http://www.strobe-statement.org).

# BMJ Open

## Improving epilepsy control among children with cerebral palsy in rural Bangladesh: A prospective cohort-based study

|                                 |                                                                                                                                                                                                                                                                                                                                                                                                                                                                                                                                                                                                                                                                                                                                                                                                                                                                                                                                                                                                                                                         |
|---------------------------------|---------------------------------------------------------------------------------------------------------------------------------------------------------------------------------------------------------------------------------------------------------------------------------------------------------------------------------------------------------------------------------------------------------------------------------------------------------------------------------------------------------------------------------------------------------------------------------------------------------------------------------------------------------------------------------------------------------------------------------------------------------------------------------------------------------------------------------------------------------------------------------------------------------------------------------------------------------------------------------------------------------------------------------------------------------|
| Journal:                        | <i>BMJ Open</i>                                                                                                                                                                                                                                                                                                                                                                                                                                                                                                                                                                                                                                                                                                                                                                                                                                                                                                                                                                                                                                         |
| Manuscript ID                   | bmjopen-2021-052578.R1                                                                                                                                                                                                                                                                                                                                                                                                                                                                                                                                                                                                                                                                                                                                                                                                                                                                                                                                                                                                                                  |
| Article Type:                   | Original research                                                                                                                                                                                                                                                                                                                                                                                                                                                                                                                                                                                                                                                                                                                                                                                                                                                                                                                                                                                                                                       |
| Date Submitted by the Author:   | 30-Nov-2021                                                                                                                                                                                                                                                                                                                                                                                                                                                                                                                                                                                                                                                                                                                                                                                                                                                                                                                                                                                                                                             |
| Complete List of Authors:       | <p>Karim, Tasneem; The University of Sydney, Discipline of Child and Adolescent Health, Children's Hospital at Westmead Clinical School; CSF Global</p> <p>Das, Manik Chandra; CSF Global; University of South Asia, Asian Institute of Disability and Development</p> <p>Muhit, Mohammad; CSF Global; University of South Asia, Asian Institute of Disability and Development</p> <p>Badawi, Nadia; The University of Sydney, Discipline of Child and Adolescent Health, Children's Hospital at Westmead Clinical School; The University of Sydney, Cerebral Palsy Alliance Research Institute, Specialty of Child &amp; Adolescent Health, Sydney Medical School, Faculty of Medicine &amp; Health</p> <p>Khandaker, Gulam; The University of Sydney, Discipline of Child and Adolescent Health, Children's Hospital at Westmead Clinical School; Central Queensland Hospital and Health Service</p> <p>Mohammad, Shekeeb S; The University of Sydney, Discipline of Child and Adolescent Health, Children's Hospital at Westmead Clinical School</p> |
| <b>Primary Subject Heading</b>: | Public health                                                                                                                                                                                                                                                                                                                                                                                                                                                                                                                                                                                                                                                                                                                                                                                                                                                                                                                                                                                                                                           |
| Secondary Subject Heading:      | Evidence based practice, Paediatrics                                                                                                                                                                                                                                                                                                                                                                                                                                                                                                                                                                                                                                                                                                                                                                                                                                                                                                                                                                                                                    |
| Keywords:                       | Epilepsy < NEUROLOGY, Developmental neurology & neurodisability < PAEDIATRICS, PUBLIC HEALTH                                                                                                                                                                                                                                                                                                                                                                                                                                                                                                                                                                                                                                                                                                                                                                                                                                                                                                                                                            |
|                                 |                                                                                                                                                                                                                                                                                                                                                                                                                                                                                                                                                                                                                                                                                                                                                                                                                                                                                                                                                                                                                                                         |

SCHOLARONE™  
Manuscripts



I, the Submitting Author has the right to grant and does grant on behalf of all authors of the Work (as defined in the below author licence), an exclusive licence and/or a non-exclusive licence for contributions from authors who are: i) UK Crown employees; ii) where BMJ has agreed a CC-BY licence shall apply, and/or iii) in accordance with the terms applicable for US Federal Government officers or employees acting as part of their official duties; on a worldwide, perpetual, irrevocable, royalty-free basis to BMJ Publishing Group Ltd ("BMJ") its licensees and where the relevant Journal is co-owned by BMJ to the co-owners of the Journal, to publish the Work in this journal and any other BMJ products and to exploit all rights, as set out in our [licence](#).

The Submitting Author accepts and understands that any supply made under these terms is made by BMJ to the Submitting Author unless you are acting as an employee on behalf of your employer or a postgraduate student of an affiliated institution which is paying any applicable article publishing charge ("APC") for Open Access articles. Where the Submitting Author wishes to make the Work available on an Open Access basis (and intends to pay the relevant APC), the terms of reuse of such Open Access shall be governed by a Creative Commons licence – details of these licences and which [Creative Commons](#) licence will apply to this Work are set out in our licence referred to above.

Other than as permitted in any relevant BMJ Author's Self Archiving Policies, I confirm this Work has not been accepted for publication elsewhere, is not being considered for publication elsewhere and does not duplicate material already published. I confirm all authors consent to publication of this Work and authorise the granting of this licence.

1  
2  
3 **Improving epilepsy control among children with cerebral palsy in rural Bangladesh: A prospective**  
4 **cohort-based study**  
5

6 Tasneem KARIM<sup>1,2,3\*</sup>, Manik Chandra DAS<sup>1,2</sup>, Mohammad MUHIT<sup>1,2</sup>, Nadia BADAWI<sup>3,4</sup>, Gulam  
7 KHANDAKER<sup>1,2,3,5</sup>, Shekeeb S MOHAMMAD<sup>3</sup>  
8  
9

10  
11 <sup>1</sup>CSF Global, Dhaka, Bangladesh  
12

13 <sup>2</sup>Asian Institute of Disability and Development (AIDD), University of South Asia, Dhaka, Bangladesh  
14

15 <sup>3</sup>Discipline of Child and Adolescent Health, Sydney Medical School, University of Sydney, Sydney,  
16 Australia  
17

18 <sup>4</sup>Cerebral Palsy Alliance Research Institute, University of Sydney, Sydney, Australia  
19

20 <sup>5</sup>Central Queensland Public Health Unit, Central Queensland Hospital and Health Service,  
21 Rockhampton, Queensland, Australia  
22

23  
24  
25 Word count: 3254, 3 figures, 1 table, 27 references  
26  
27  
28  
29  
30  
31  
32  
33  
34  
35  
36  
37  
38  
39  
40  
41  
42  
43  
44  
45  
46  
47  
48  
49

50 **Corresponding Author**

51 Dr Shekeeb S Mohammad

52 The University of Sydney Children's Hospital Westmead Clinical School, Locked Bag 4001, NSW 2145  
53 Australia

54 Tel: 00 61 298 450 182

55 Email: [shekeeb.mohammad@sydney.edu.au](mailto:shekeeb.mohammad@sydney.edu.au)  
56  
57  
58  
59  
60

**ABSTRACT**

**Objective:** To define the prevalence and seizure subtypes among children with cerebral palsy (CP) in rural Bangladesh and explore barriers to optimum epilepsy control.

**Design:** Prospective cohort study

**Setting:** The study was conducted in Shahjadpur, a rural subdistrict of Bangladesh.

**Participants:** Children (<18 years) with CP and epilepsy identified using the Bangladesh CP Register in the study site.

**Methods:** Assessments were conducted in three focused epilepsy clinics overseen by a pediatric neurologist between December 2016 - January 2018, with intervening phone and video-conference follow-ups. Details of event type, frequency and medication compliance were collected. Antiepileptic drugs (AED) were prescribed based on seizure type, family income, comorbidity and medication availability.

**Results:** 23.4% (170/726) of the BCPR cohort had a clinical diagnosis of epilepsy of whom 166 were assessed. Following the focused epilepsy clinics, 62.0% (103/166) children were clinically determined to have ongoing epileptic seizures. 62.1% (64/103) had generalized onset tonic clonic seizures, 27.2% (28/103) had focal onset seizures with impaired awareness and 10.7% (11/103) had other seizure types. None of the children with prolonged seizures (31/103) had an emergency seizure management plan. Non-epileptic events were being pharmacologically treated as seizures in 18.1% (30/166) children. Financial constraints were the main reason for non-compliance on follow up.

**Conclusions:** Gaps in optimum epilepsy management in rural Bangladesh are amenable to improvement anchored with local health care workers. Training and clinical care focused on recognition of common seizure types, seizure mimics and rationalizing use of available AEDs can be facilitated by better referral pathways and telehealth support.

**Key Words:** Epilepsy, cerebral palsy, Bangladesh, CP

### Strengths and limitations of this study

- Children with CP and epilepsy identified through an ongoing population-based surveillance.
- Specialist clinical assessments were conducted overseen by a paediatric neurologist.
- Phone follow-ups were conducted.
- The study provided opportunity for continuing local capacity building.
- The clinical diagnoses relied on clinical impression and were not corroborated by investigations.

For peer review only

## INTRODUCTION

Cerebral palsy (CP) is a term that defines a heterogenous group of early-onset, non-progressive, neurodevelopmental disorders secondary to injury to the developing brain [1]. Studies show that among children with CP epilepsy is associated with greater impairment of cognitive function, poorer motor outcomes, more profound behavioral and psychological problems, and poorer quality of life, all of which collectively contribute to a greater burden of disability and care [2]. In comparison to children with epilepsy only, children with CP and epilepsy tend to have early onset of seizures which can often be difficult to control [3].

Recent estimates from a population-based study in Bangladesh showed a high burden of CP with an estimated prevalence of 3.4 per 1000 children [4]. Bangladesh is one of the most densely populated and under resourced countries in the world [5]. The World Health Organization (WHO) classified Bangladesh as one of the countries with severe shortages of health workers. There is inequity in the skill mix and distribution of health workers between urban and rural Bangladesh [6]. One of the four axes of the value-based framework for global health delivery highlights the need for alignment of care delivery to the local context [7].

Resources for the diagnosis and management of neurologic disorders such as epilepsy are often limited in low and middle-income countries (LMICs) such as Bangladesh [8]. Several aspects of epilepsy management that may be considered routine in tertiary or specialist settings are not applicable to community-based settings [9]. There is a substantial epilepsy treatment gap in low resource settings owing to a wide spectrum of factors including shortage of doctors particularly in the rural areas,[6] lack of available investigation and inpatient treatment facilities as well as decreased service utilization due to the stigma around a disability diagnosis.[10]

We aimed to define the prevalence, clinical phenotypes and barriers to optimum epilepsy control among children with CP in a community-based setting in Bangladesh.

## METHODS AND ANALYSIS

### Cohort compilation

We used the Bangladesh CP Register (BCPR); a prospective population-based surveillance of children with CP in Shahjadpur a northern subdistrict of Rajshahi division in Bangladesh for identification of children with CP and epilepsy.

1  
2  
3 Medical assessment camps are conducted on a regular basis in the surveillance sites for BCPR. A  
4 multidisciplinary medical assessment team including a paediatrician, a physiotherapist, and a  
5 counsellor conduct detailed assessment for data collection for the BCPR. Data on the presence of  
6 associated impairments including epilepsy are also documented based on review of limited available  
7 medical records, report by the parents or primary caregivers of the children with CP, and clinical  
8 assessment by the medical assessment team. Detailed account of the BCPR study protocol and  
9 findings have been described in previous publications [4].  
10  
11  
12  
13  
14  
15

16 During the BCPR medical assessment camps preceding this study, a diagnosis of epilepsy had been  
17 based on history of one or more unprovoked seizures in the previous 3 months recorded by medical  
18 practitioners and review of any available medical records [4].  
19  
20  
21  
22

### 23 **Clinical assessment of epilepsy**

24 Children with CP and epilepsy identified via the BCPR were clinically reviewed in three focused  
25 epilepsy clinics held for three days each time at three different locations within the BCPR study site.  
26 Specialist clinical assessments at the clinics were overseen by a pediatric neurologist from Australia  
27 (SM) who travelled to Bangladesh for the focused epilepsy clinics during the study period. Diagnoses  
28 of epilepsy and seizure like events were reviewed during assessment in the clinics. Details of  
29 seizure/event type, frequency, medication use, and compliance were collected according to a  
30 predesigned standard proforma (Appendix A). Workflow during the clinic is outlined in Figure 1.  
31  
32  
33  
34  
35  
36  
37

### 38 **Local capacity building**

39 Two physicians (TK and MCD) were trained by the pediatric neurologist in classifying seizure types  
40 according to the 2017 International League Against Epilepsy (ILAE) guidelines [11], demonstration of  
41 clinical signs during the epilepsy clinics, and discussions around seizure mimics and drug choice  
42 (Appendix B). One community worker based in the study area was also trained to conduct phone  
43 follow ups of the children on antiepileptic drugs (AED).  
44  
45  
46  
47  
48  
49

### 50 **Selection of antiepileptic drugs**

51 Before the clinics, the community worker collected information on availability and cost of AED in  
52 local pharmacies within the study area between December 2016 and January 2018. A dose  
53 equivalence table was drawn up for easy prescription in the clinic along with notes on important side  
54 effects and interactions. During the clinics, AED were prescribed based on seizure type, medication  
55  
56  
57  
58  
59  
60



1  
2  
3 availability and family income. The approach undertaken for shared decision making in AED  
4 prescription is outlined in Figure 2.  
5  
6  
7

### 8 **Telehealth supported follow up and clinics**

#### 9 *Phone follow up*

10 Targeted phone follow ups of the children on AED were conducted by the trained community health  
11 worker every three months during the study period, following the initial specialist assessment at the  
12 focused epilepsy clinics. The phone follow ups were semi-structured. The design, conduct and the  
13 outcome measures for the follow ups were additionally informed by the study team's experience  
14 and input from the primary caregivers (Appendix C). Seizure control was documented during phone  
15 follow ups. In our study seizure control was defined as no reported seizure between the clinic and  
16 follow up.  
17  
18  
19  
20  
21  
22  
23  
24  
25  
26

### 27 **Patient and Public Involvement**

28 This work was informed by the priorities, experience and preferences of the primary caregivers of  
29 the children with CP and epilepsy who participated in the study. The design and implementation of  
30 the follow ups, including outcome measures important to the study participants, relied on feedback  
31 from families of children with CP and epilepsy. Baseline information was communicated to the  
32 primary caregivers by the study team. This informed shared decision making related to the  
33 treatment and follow up for their children. Furthermore, the follow ups were conducted by a local  
34 community worker and local physician, which enhanced community involvement during and beyond  
35 the study.  
36  
37  
38  
39  
40  
41  
42  
43

### 44 **Statistical analysis**

45 Descriptive analyses were carried out. All statistical analysis was conducted using SPSS version 24  
46 (IBM Armonk, NY, USA).  
47  
48  
49

### 50 **Ethics**

51 This study was conducted as part of the Bangladesh Cerebral Palsy Register Study which has been  
52 approved by the Bangladesh Medical Research Council (BMRC) Human Research Ethics Committee  
53 (Ref no. BMRC/NREC/2013–2016/1267) in Bangladesh, and by the Cerebral Palsy Alliance NHRMC  
54 Human Research Ethics Committee (Ref no.2015–03-02) in Australia. Written informed consent was  
55 taken from the primary caregiver/parents/guardian of the children with CP.  
56  
57  
58  
59  
60

## RESULTS

### Prevalence and basic demographic characteristics

726 children with CP were registered into the BCPR between January 2015 and December 2016, 23.4% (170/726) of whom had a clinical diagnosis of epilepsy. 166 of these children attended the three focused epilepsy clinics between December 2016 and January 2018 and form the study cohort. 55 (33.1%) were female. The mean age of the children was 6 years 10 months (SD: 4 years 5 months) years.

After the focused epilepsy clinics, 62.0% (103/166) children were clinically determined to have ongoing epileptic seizures based on review of their history, existing medical records and specialist clinical evaluation (Figure 3). Therefore, the revised prevalence of epilepsy among the BCPR cohort during the study period was 14.3%.

### Seizure subtypes

62.1% (64/103) had generalized onset tonic clonic seizures (GTCS), 27.2% (28/103) had focal onset seizures with impaired awareness and 5.8% (6/103) had other seizure types (focal onset aware seizures, epileptic spasms, generalized onset myoclonic seizures and generalized onset tonic seizures). 11.6% (12/103) had multiple seizure types. Data on seizure type was unclear on history for 4.9% (5/103). At the time of first assessment, seizures were already controlled with AED in 5.8% (6/103) children. 30.1% (31/103) of children had a history of prolonged seizures (>30 minutes) and none of these patients had an emergency seizure plan. Their caregivers tended to wait at home till the seizures settled and did not seek emergency medical assistance due to geographical or financial constraints.

### Barriers to optimum epilepsy control

#### *Non-epileptic events among children with CP*

Non-epileptic events were determined to have been mislabeled as seizures in 18.1% (30/166) children which included extremity clonus (n=7), dystonic postures (n=6), spasticity related spasms (n=4), breath holding spells (n=3), mannerisms (n=3), sleep related myoclonic jerks (n=2), startles (n=2), stereotypies (n=2) and rhythmic movement disorders in sleep (n=1). 23.3% (7/30) of these children were being treated with AED. AED was stopped for all seven of them. At follow up none of them worsened, thereby, further confirming the misdiagnosis of epilepsy and unnecessary administration of AED to these children.

### *Epilepsy control*

Of the 103 children with seizures, 62 were already on AEDs at the time of our clinical review. Polypharmacy with more than two concurrent AED was commonly observed and AED changes were made for the majority of them. Advised AED changes consisted of dose alteration in 54.8% (34/62) and medication change in 17.7% (11/62). 27.4% (17/62) were advised to continue treatment already initiated by various providers. We initiated treatment for 39/41 children not previously on AED who were clinically determined to still be having epileptic seizures; 2/41 only had short seizures once or twice a year and were not put on AED.

### **Telehealth supported follow up and clinics**

#### *Phone follow up*

We were able to review 75.8% (78/90) children with epileptic seizures on follow up during the study period. On follow-up (median 6.0 months), 69.2% (54/78) were taking prescribed medications as advised. Among them 75.9% (41/54) showed improvement in seizure control (>50% seizure reduction), including 14 children whose seizures were controlled. 30.8% (24/78) families had discontinued the advised treatment due to affordability (8/24, 33.3%), excessive drowsiness (7/24, 29.2%), development of a rash (4/24, 16.7%), no perceived benefit with medication and lack of understanding behind the use of regular medications (2/24, 8.3%). Three (3/24, 12.5%) children who discontinued medications were reported to no longer have seizures. None of the families reported any adverse effects that led to reported cardiorespiratory compromise, hospital presentation or death.

Two children from our cohort died during the follow up period, one due to meningitis and the other due to a lower respiratory tract infection. Their cause of death was determined by verbal autopsy conducted as part of a separate study [12].

### **DISCUSSION**

Epilepsy is a significant comorbidity in some individuals with CP. Previous studies have described a prevalence of 15-90% epilepsy in CP cohorts [13,14]. Methodological differences in identification of children with CP (population-based vs institutional based recruitment) and use of variable definitions of epilepsy in studies contribute further to the reported differences in rates of epilepsy among children with CP. The Australian CP register defined epilepsy as “two or more afebrile seizures

1  
2  
3 before age 5 years; excluding neonatal seizures” while other definitions for epilepsy used across the  
4 literature include use of AED, insurance claims and parent reported diagnosis [15]. As one of the  
5 most common associated impairments of CP, we recommend the use of a harmonized definition i.e.,  
6 the ILAE definition for description of epilepsy within CP registers to enable accurate estimation of  
7 rates of and meaningful comparisons.  
8  
9  
10  
11

12  
13 The rate of epilepsy observed among children with CP in our study is consistent with rates reported  
14 in other low resource settings such as Indonesia where 13.5% of children with CP had epilepsy [16].  
15 The Australian CP Register reports that epilepsy was more common amongst children with post-  
16 neonatally acquired CP compared to pre/perinatally acquired CP (50% vs 30%). This eludes into the  
17 potential role of antecedents of CP on the proportion of children with epilepsy in CP cohorts. There  
18 is a growing body of evidence on the differences in the prevailing risk factors and timing of  
19 acquisition of CP among children in low resource settings compared to high income countries  
20 [4,16,17]. These factors are often associated with varied likelihood of having epilepsy, therefore,  
21 further contribute to the wide-ranging reported rates of epilepsy among children with CP globally.  
22  
23  
24  
25  
26  
27  
28  
29

30 Overall, epilepsy contributes more significantly to the global burden of disease in resource poor  
31 settings as evident from the 2015 Global burden of disease studies. We found an initial prevalence of  
32 epilepsy of 23.4% in our cohort. Interestingly, following reassessment in our clinics, as described, this  
33 was revised to 14.3%. Previous studies have also noted such discrepancy between determination of  
34 a clinical diagnosis of epilepsy between specialist and community-based settings with a misdiagnosis  
35 of epilepsy being made in as many as 25% of cases [18]. This has flow on impacts as we noted in  
36 terms of incorrect, often excessive use of medications. Epilepsy poses substantial economic burden  
37 on families [19]. When families devote a significant proportion of their finances, attention, time or  
38 all of these towards one aspect of their child’s management, other aspects of care such as physical  
39 therapy, nutrition, pain and musculoskeletal management are likely to be neglected, more so in  
40 resource poor settings [20].  
41  
42  
43  
44  
45  
46  
47  
48  
49

50 As demonstrated by recent innovative projects in neighbouring Nepal, education of community level  
51 workers and general medical practitioners can lead to more consistent clinical diagnosis of epilepsy  
52 [21]. In our experience, rationalisation or cessation of medications after focused clinical assessments  
53 led to changes in family finances diverted towards medication use. We envision that the  
54 development of simplified print and multimedia based educational resources for health care workers  
55  
56  
57  
58  
59  
60

1  
2  
3 and medical practitioners hold the potential to improve epilepsy diagnosis in resource scarce  
4 settings such as our study site.  
5  
6

7  
8 Polypharmacy with more than two concurrent AEDs is unlikely to contribute significantly to seizure  
9 control [22]. In countries like Bangladesh with a mismatch of clinical care practices between urban  
10 and rural areas, the use of less conventional or alternative medications is very likely to be  
11 encountered.  
12  
13  
14

15  
16 AED availability is very limited in rural Bangladesh [23]. Medications need to be purchased by  
17 families and hence, cost per month for AEDs is a significant consideration when choosing  
18 medications for chronic use to ensure good compliance. The cheapest and most readily available  
19 AEDs are phenobarbitone, clobazam and sodium valproate. If a diagnosis of CP is very likely based on  
20 clinical evaluation and history, earlier use of sodium valproate or clobazam in this setting is a viable  
21 option for transitioning from phenobarbitone which is most commonly prescribed in infancy. As  
22 outlined in our methods and Figure 2, AED choice can be rationalized based not only on the seizure  
23 type but also existing comorbidity as some AEDs can help improve comorbid psychiatric symptoms  
24 or sleep disturbance.  
25  
26  
27  
28  
29  
30  
31

32  
33 Our experience highlighted a gap in the recognition and management of prolonged seizures in  
34 settings like ours compared to conventional management in urban and resource rich settings.  
35 Benzodiazepines are the mainstay of out of hospital, particularly health worker or parent led  
36 management of prolonged seizures. However, midazolam or lorazepam are not available at all in  
37 rural Bangladesh. Diazepam is only available in glass ampoules through restricted prescriptions in  
38 some pharmacy outlets. In our and wider reported experience caregivers are often reluctant to use  
39 glass ampoules or follow several steps in medication administration to a child at home [24]. Other  
40 readily available benzodiazepines are cheap (clobazam: 0.042 USD per 10 mg tablet and clonazepam:  
41 0.048 USD per 1 mg tablet; prices mid 2018) but there is very little evidence regarding their use in  
42 the setting of prolonged seizures [25,26]. Status epilepticus can significantly add to the burden of  
43 cumulative brain injury and therefore warrants a solution [27]. This may be in the form of a per-  
44 rectal, oral or, alternative routes for delivery of well-established medications for status epilepticus  
45 such as phenobarbitone, valproate or midazolam. Alternatively, the use of medications such as  
46 clonazepam drops via open label trials requires urgent exploration for such settings.  
47  
48  
49  
50  
51  
52  
53  
54  
55  
56  
57  
58  
59  
60

1  
2  
3 Our model has demonstrated that immediate positive impact on epilepsy management and  
4 reduction in burden of care on families can be achieved through structured assessments by medical  
5 and allied personnel who are trained to assess children for epilepsy and use available medications  
6 according to a structured framework. This can be achieved for a population base such as in our study  
7 area with limited personnel and without additional investigation or formalized health care facilities,  
8 though these would be desirable to further improve patient outcomes.  
9  
10  
11  
12  
13

14  
15 We piloted the use of videoconference-based telemedicine clinics after initial face to face clinics.  
16 Telemedicine clinics were initiated in May 2018 and held on a monthly basis using Skype as part of  
17 ongoing capacity building to improve epilepsy control among the study cohort. The local trained  
18 physician saw the patients face to face in the study site and used a handheld, internet connected  
19 tablet to videoconference with the pediatric neurologist in Australia. Patient interview for new and  
20 follow up patients followed a set format (Appendix C). New patient data from the telemedicine  
21 clinics are not included in this paper. Five telemedicine clinics undertaken in 2018 contributed to  
22 patient follow up and clinical capacity building. During these clinics 47 patients were seen by a local  
23 medical practitioner with internet-based videoconference support from the pediatric neurologist in  
24 Australia. Each clinic was of three hours duration during which patient interview was undertaken in  
25 the same manner as in the focused epilepsy clinics. Thirty minutes were marked during each clinic  
26 for discussion regarding clinical signs, history taking and AED choice. Clinical details for new patients  
27 reviewed during telemedicine clinics were not included in this cohort. These clinics created  
28 mentoring opportunity for the local team which is a substantial contribution towards for long term  
29 sustainability. Unfortunately, this process was interrupted due to limited local team and patient  
30 mobility in 2020 and 2021 due to the pandemic therefore limiting structured data from this phase.  
31 We aim to resume this approach to maintain a sustainable model for ongoing care.  
32  
33  
34  
35  
36  
37  
38  
39  
40  
41  
42  
43  
44

45 With some prior training in the use of a structured clinical approach, this method can be very time-  
46 efficient in reviewing patients led by a non-specialist medical practitioner/community worker and  
47 supported by a specialist. In our experience, this not only provided continuity of clinical support with  
48 existing personnel but also provided an opportunity for continuing professional development and  
49 capacity building. We hope that in the post-COVID era, implementation and incorporation of  
50 telemedicine should be easier and more acceptable to providers, policymakers and the community.  
51  
52  
53  
54  
55  
56

57 We summarize the key barriers identified and proposed or already implemented solutions in Table 1.  
58 Development of multimedia or mobile application-based resources that may simply illustrate clinical  
59  
60

1  
2  
3 assessment of children with epilepsy, examples of non-epileptic events and emergency seizure  
4 management will provide convenient means for translation of our findings to the wider population  
5 in Bangladesh and, with language translation, to similar resource poor settings across the world.  
6  
7  
8  
9

10 We have engaged with tertiary paediatric neurology centres in Bangladesh to support some families  
11 with requisite investigations or more frequent specialist review. However, this will always be limited  
12 to financial and logistic constraints of rural families.  
13  
14  
15

### 16 **Study limitations**

17 We did not systematically collect baseline investigation information for this cohort as a small  
18 proportion had any previous tests such as electroencephalography (EEG) or neuroimaging. The  
19 clinical diagnosis of seizures and non-epileptic events were not corroborated by investigations as  
20 they were unavailable in this resource limited setting. We acknowledge that there is a potential for  
21 having underdiagnosed seizures if they had last occurred several months prior to our assessment and  
22 also being dependent on parental recall and description. We had to rely on the clinical impression of  
23 a limited number of observers. Although we utilized standard criteria to assess seizure reduction, the  
24 collection of the follow up data was based on reporting by the primary caregiver which may have  
25 been a source of potential bias.  
26  
27  
28  
29  
30  
31  
32  
33  
34

### 35 **CONCLUSION**

36 Epilepsy is prevalent among children with CP in rural Bangladesh and the various gaps in optimum  
37 epilepsy management are lack regular follow-up, recognition of common seizure types and non-  
38 epileptic seizure mimics, familiarization with commonly available, affordable AED and availability of  
39 guidelines for prolonged seizure management. These gaps are amenable to proposed low cost,  
40 educational interventions. Health care workers can improve epilepsy management with regular  
41 follow-up, education on common seizure types, seizure mimics, use of commonly available,  
42 affordable AED and guidelines for prolonged seizure management.  
43  
44  
45  
46  
47  
48  
49

### 50 **AUTHORS' CONTRIBUTION**

51 All listed authors meet the appropriate authorship criteria, and nobody who qualifies for authorship  
52 has been omitted. GK and SM conceptualized and established this research study. They also  
53 contributed to study design, development of the study materials and overall conduct of the study  
54 supported by TK. SM, TK and MCD were responsible for assessment of study participants and data  
55 collection. SM, GK, NB and MM provided specialist advice in this study. TK, SM and GK completed  
56  
57  
58  
59  
60

1  
2  
3 data analysis, interpretation of the data and drafted the initial and revised manuscript with input  
4 from all the co-authors. All authors have read and approved the final manuscript.  
5  
6  
7

#### 8 **FUNDING STATEMENT**

9  
10 This study has been conducted as part of the BCPR study funded by the Cerebral Palsy Alliance  
11 Research Foundation (PG4314) and through internal funding from CSF Global, Bangladesh. TK is  
12 supported by the Cerebral Palsy Alliance Research Foundation (CDG04617, PHD02119). SM is  
13 supported by Cerebral Palsy Alliance Research Foundation Career Development Grant (CDG7916).  
14 The study funders played no role in the design of the study and collection, analysis, interpretation of  
15 data and in the preparation of the manuscript, and in the decision to submit the paper for  
16 publication.  
17  
18  
19  
20  
21  
22

#### 23 **ACKNOWLEDGEMENTS**

24 We would like to acknowledge the CSF Global team in Bangladesh for their cordial support in  
25 implementing this project and supporting the families of children with CP in referrals and access to  
26 services. We also want to acknowledge the primary caregivers of the children with CP and epilepsy  
27 who participated in the study. Their input was invaluable to the design and conduct of this study.  
28  
29  
30  
31  
32

#### 33 **CONFLICT OF INTEREST DISCLOSURES**

34 The authors declare no competing interests.  
35  
36  
37  
38

#### 39 **DATA AVAILABILITY STATEMENT**

40 No additional data are available.  
41  
42  
43  
44  
45  
46  
47  
48  
49  
50  
51  
52  
53  
54  
55  
56  
57  
58  
59  
60



**REFERENCES**

- [1] Bax M, Goldstein M, Rosenbaum P, Leviton A, Paneth N, Dan B, et al. Proposed definition and classification of cerebral palsy, April 2005. *Developmental Medicine & Child Neurology*. 2005;47(8):571-6.
- [2] Mesraoua B, Ali M, Deleu D, Al Hail H, Melikyan G, Haddad N, Alalamy O, Athanasios C, Asadi-Pooya AA. *Epilepsy and Cerebral Palsy*. Neurodevelopment and Neurodevelopmental Disorder 2019 May 8. IntechOpen.
- [3] Singhi P, Jagirdar S, Khandelwal N, Malhi P. *Epilepsy in children with cerebral palsy*. *Journal of Child Neurology*. 2003;18(3):174-9.
- [4] Khandaker G, Muhit M, Karim T, Smithers-Sheedy H, Novak I, Jones C, et al. *Epidemiology of cerebral palsy in Bangladesh: a population-based surveillance study*. *Developmental Medicine & Child Neurology*. 2019 May;61(5):601-9.
- [5] National Institute of Population Research and Training (NIPORT), ICF International. *Bangladesh Demographic and Health Survey*. Dhaka, Bangladesh; 2014.
- [6] Ahmed SM, Hossain MA, RajaChowdhury AM, Bhuiya AU. *The health workforce crisis in Bangladesh: shortage, inappropriate skill-mix and inequitable distribution*. *Human Resources for Health*. 2011;9(1):3.
- [7] Kim JY, Farmer P, Porter ME. *Redefining global health-care delivery*. *The Lancet*. 2013;382(9897):1060-9.
- [8] Bearden DR. *Pediatric Neurology in Resource-Limited Settings: a Systematic Review*. *Current Pediatrics Reports*. 2018;6(1):34-9.
- [9] Kim JY FP, Porter ME. *A global health delivery framework approach to epilepsy care in resource-limited settings*. *Journal of the Neurological Sciences*. 2015;358(1-2):263-5.
- [10] Patel P, Baier J, Baranov E, Khurana E, Gambrah-Sampaney C, Johnson A, et al. *Health beliefs regarding pediatric cerebral palsy among caregivers in Botswana: A qualitative study*. *Child: Care, Health and Development*. 2017;43(6):861-8.
- [11] Fisher RS, Cross JH, French JA, et al. *Operational classification of seizure types by the International League Against Epilepsy: Position Paper of the ILAE Commission for Classification and Terminology*. *Epilepsia* 2017;58:522–530
- [12] Jahan I, Karim T, Das MC, Muhit M, McIntyre S, Smithers-Sheedy H, Badawi N, Khandaker G. *Mortality in children with cerebral palsy in rural Bangladesh: a population-based surveillance study*. *Developmental Medicine & Child Neurology*. 2019 Nov;61(11):1336-43.
- [13] Aicardi J. *Epilepsy in Brain-Injured Children*. *Developmental Medicine & Child Neurology*. 2010;32(3):191-202.
- [14] Aksu F. *Nature and Prognosis of Seizures In Patients With Cerebral Palsy*. *Developmental Medicine & Child Neurology*. 2008;32(8):661-8.
- [15] *Report of the Australian Cerebral Palsy Register Birth years 1995-2012, November 2018*
- [16] Jahan I, Al Imam MH, Karim T, Muhit M, Hardianto D, Das MC, Smithers-Sheedy H, Badawi N, Khandaker G. *Epidemiology of cerebral palsy in Sumba Island, Indonesia*. *Developmental Medicine & Child Neurology*. 2020 Dec;62(12):1414-22.
- [17] Karim T, Dossetor R, Huong Giang NT, Dung TQ, Son TV, Hoa NX, Tuyet NH, Van Anh NT, Chau CM, Bang NV, Badawi N. *Data on cerebral palsy in Vietnam will inform clinical practice and policy in low and middle-income countries*. *Disability and Rehabilitation*. 2021 Jan 9:1-8.
- [18] National Clinical Guideline Centre. *The epilepsies: the diagnosis and management of the epilepsies in adults and children in primary and secondary care*.

1  
2  
3 <http://www.nice.org.uk/nicemedia/live/13635/57784/57784.pdf> (accessed  
4 March 2021)

5  
6 [19] Allers K, Essue BM, Hackett ML, Muhunthan J, Anderson CS, Pickles K, Scheibe F, Jan S. The  
7 economic impact of epilepsy: a systematic review. *BMC neurology*. 2015 Dec 1;15(1):245.

8 [20] Nuri RP, Aldersey HM, Ghahari S. Needs of families of children with cerebral palsy in  
9 Bangladesh: A qualitative study. *Child: Care, Health and Development*. 2018;45(1):36-44.

10 [21] Rajbhandari H, Joshi S, Malakar S, Paudel P, Jain P, Uppadaya K, et al. Epilepsy field workers,  
11 a smartphone application and telephone telemedicine: Safe and effective epilepsy care in rural  
12 Nepal. *Seizure*. 2019;64:54-8.

13 [22] Patsalos PN, Perucca E. Clinically important drug interactions in epilepsy: general features  
14 and interactions between antiepileptic drugs. *The Lancet Neurology*. 2003;2(6):347-56.

15 [23] Hussain ME. Burden of Epilepsy in Bangladesh: Current Approach. *Journal of Current and  
16 Advance Medical Research*. 2018;4(1):1-2.

17 [24] Chiang LM, Wang HS, Shen HH, Deng ST, Tseng CH, Chen YI, Chou ML, Hung PC, Lin KL. Rectal  
18 diazepam solution is as good as rectal administration of intravenous diazepam in the first-aid  
19 cessation of seizures in children with intractable epilepsy. *Pediatrics & Neonatology*. 2011 Feb  
20 1;52(1):30-3.

21 [25] Shangguan Y, Liao H, Wang X. Clonazepam in the treatment of status epilepticus. *Expert  
22 Review of Neurotherapeutics*. 2015;15(7):733-40.

23 [26] Treiman DM, Meyers PD, Walton NY, Collins JF, Colling C, Rowan AJ, et al. A Comparison of  
24 Four Treatments for Generalized Convulsive Status Epilepticus. *New England Journal of Medicine*.  
25 1998;339(12):792-8.

26 [27] Kwong KL, Wong SN, So KT. Epilepsy in children with cerebral palsy. *Pediatric Neurology*.  
27 1998;19(1):31-6.

**Table 1:** Barriers to epilepsy control and suggested interventions

| <b>Barriers</b>                                                         | <b>Suggested interventions</b>                                                                                                                                                  |
|-------------------------------------------------------------------------|---------------------------------------------------------------------------------------------------------------------------------------------------------------------------------|
| AED availability                                                        | Selection of locally available medications for management through a structured guideline                                                                                        |
| Lack of skilled personnel for epilepsy management and follow up locally | Capacity building and engagement of local medical practitioners and community health workers<br>Development of multimedia or mobile application-based resources<br>Telemedicine |
| Affordability                                                           | Rationalization of drugs                                                                                                                                                        |
| Poor treatment compliance                                               | Rationalization of drugs<br>Training and engagement of health workers for follow up<br>Caregiver education                                                                      |
| Prolonged seizure management                                            | Development of guideline and resources for management of prolonged seizure for training of local health workers                                                                 |
| Misidentification of non-epileptic episodes as seizures                 | Development of video resources describing seizures and non-epileptic events                                                                                                     |
| Lack of parental understanding regarding epilepsy treatment             | Parent education on epilepsy treatment                                                                                                                                          |

**Figure 1:** Clinical assessment of epilepsy in children with CP in Shahjadpur

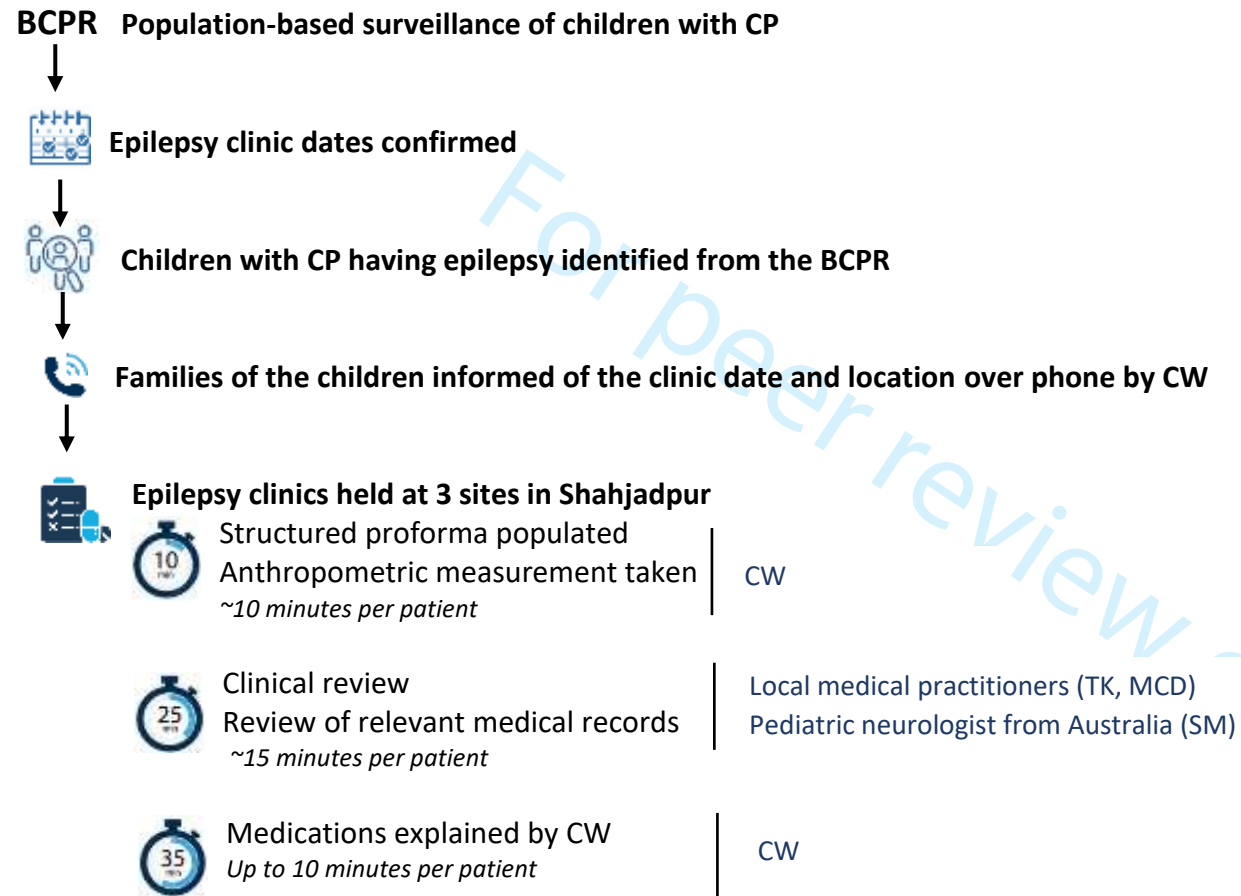

CP: cerebral palsy, BCPR: Bangladesh Cerebral Palsy Register, CW: community worker

**Figure 2:** Suggested considerations in choice of medications for seizures and comorbidity in children with cerebral palsy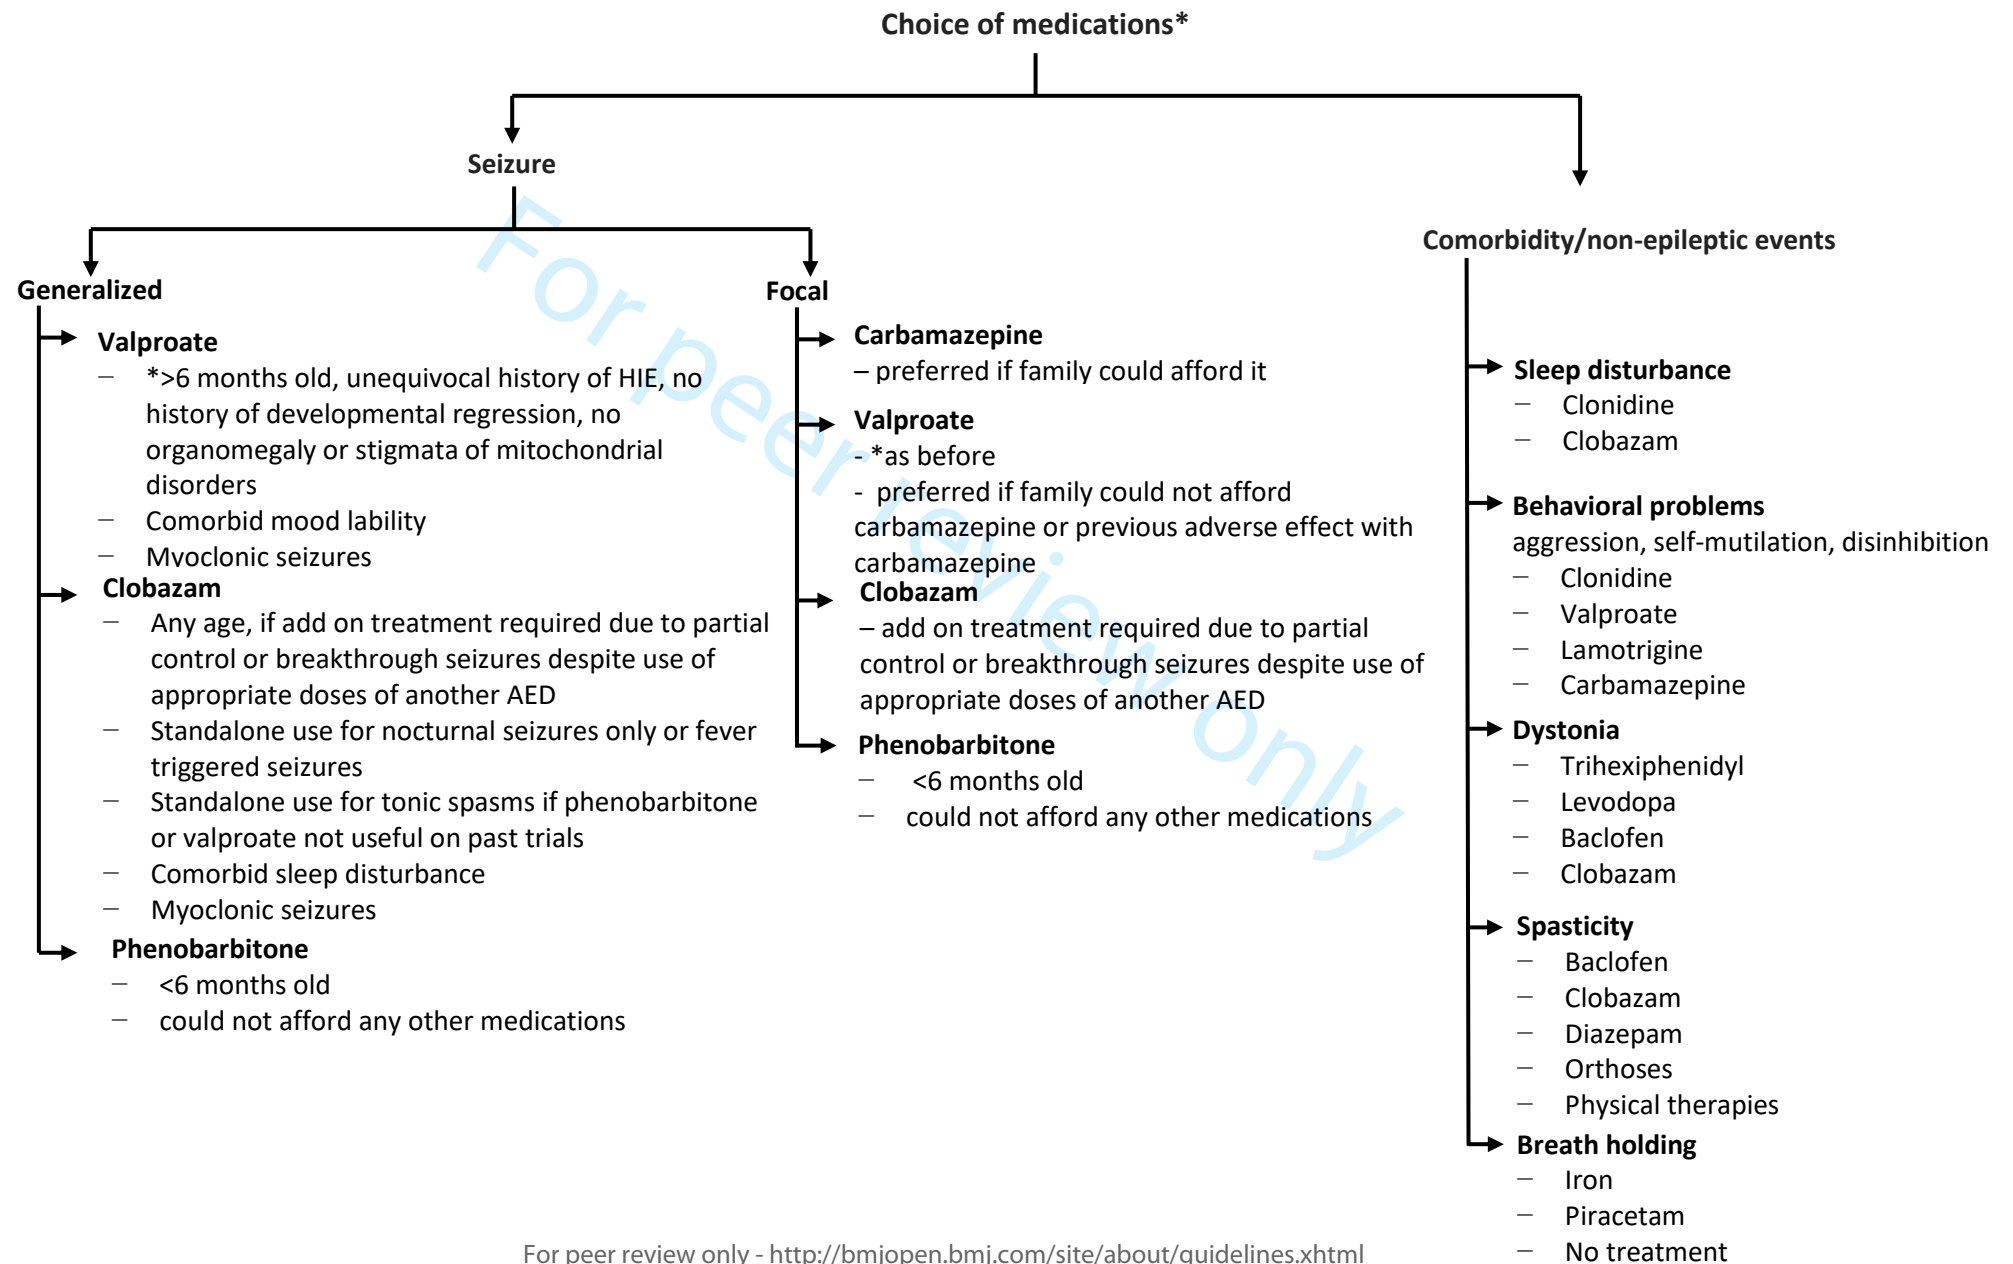For peer review only - <http://bmjopen.bmj.com/site/about/guidelines.xhtml>

\*All medications are listed in order of preference for management

**Figure 3: Study diagram**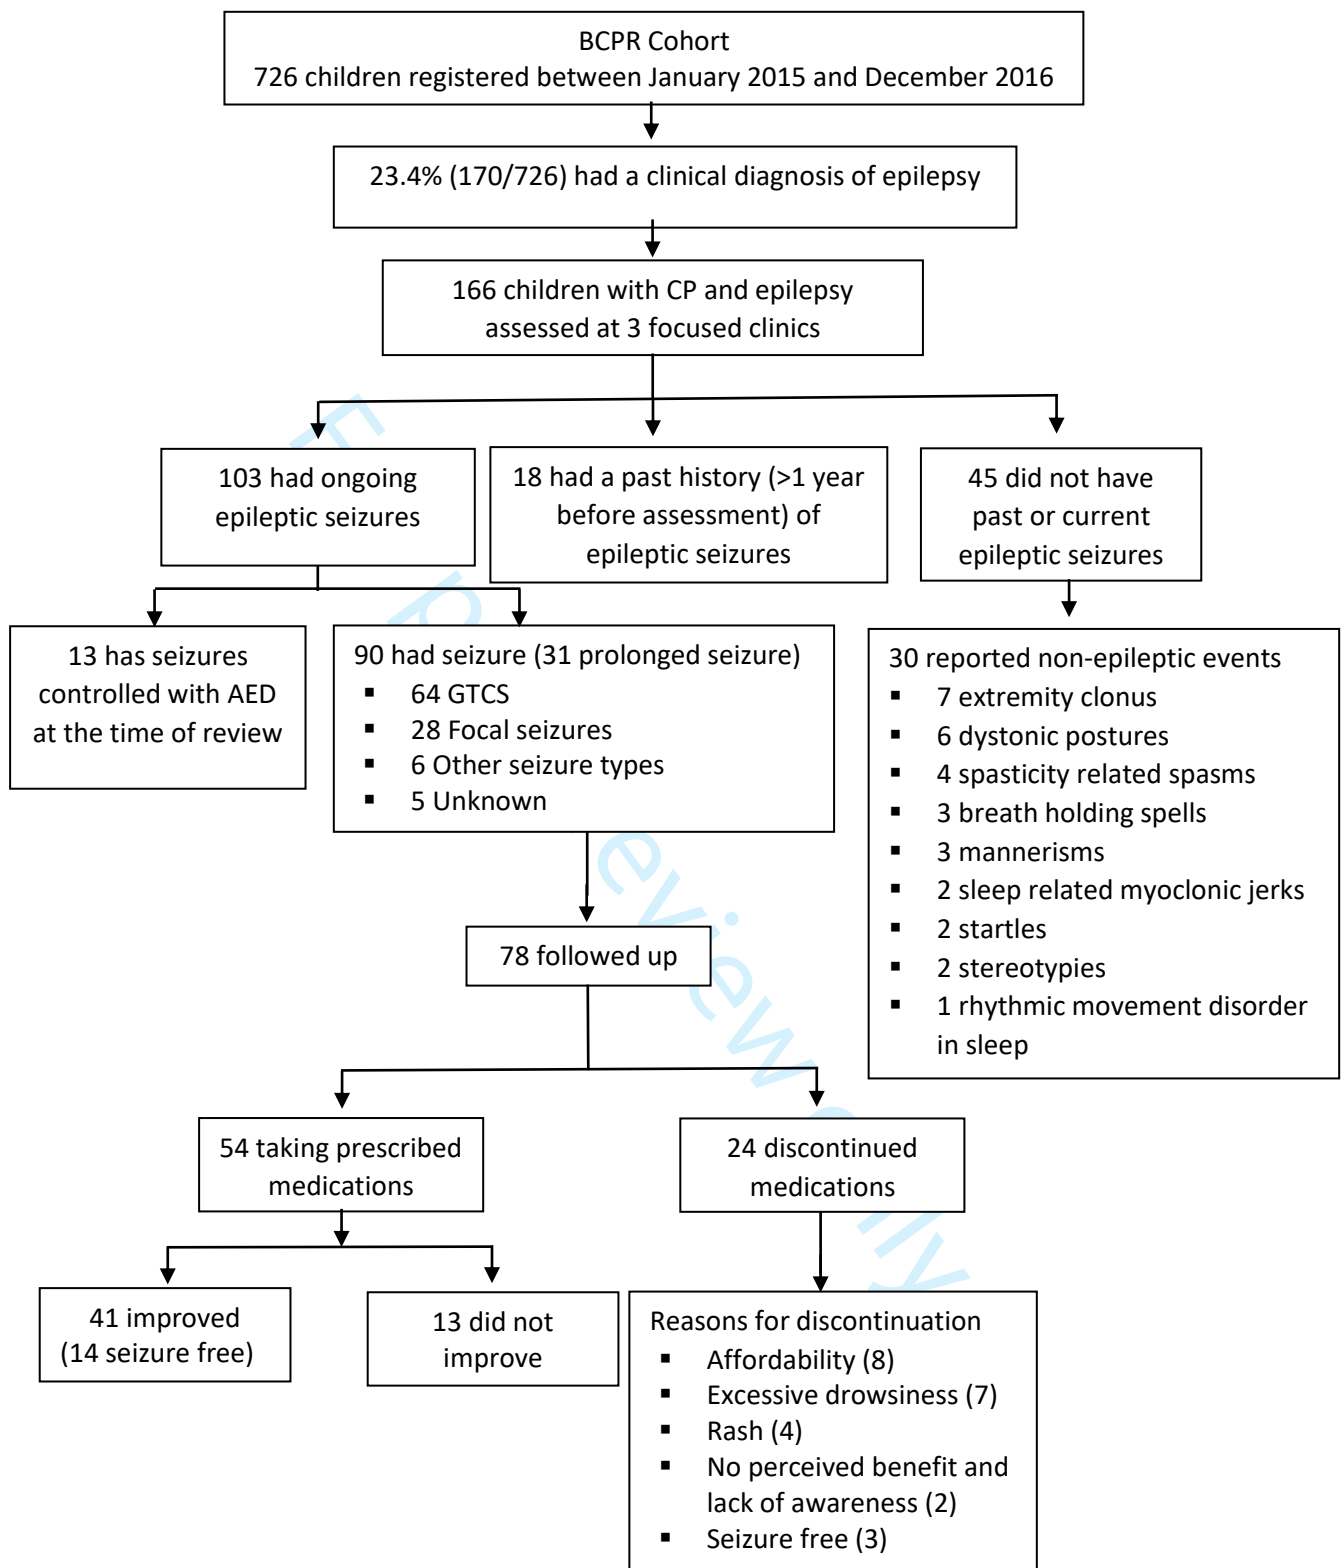

**Appendix A:** Clinic proforma used during focused epilepsy clinics

|                                                                                                                                                                                                                                                                                           |                                                                      |                                        |
|-------------------------------------------------------------------------------------------------------------------------------------------------------------------------------------------------------------------------------------------------------------------------------------------|----------------------------------------------------------------------|----------------------------------------|
| <b>ASSESSMENT DETAILS</b>                                                                                                                                                                                                                                                                 |                                                                      |                                        |
| <b>ID NUMBER:</b>                                                                                                                                                                                                                                                                         |                                                                      | <b>SERIAL NUMBER:</b>                  |
| <b>ASSESSMENT LOCATION:</b>                                                                                                                                                                                                                                                               |                                                                      | <b>ASSESSMENT DATE:</b> DD / MM / YYYY |
| <b>CHILD'S DETAILS</b>                                                                                                                                                                                                                                                                    |                                                                      |                                        |
| <b>NAME:</b>                                                                                                                                                                                                                                                                              | <b>GENDER:</b> <input type="checkbox"/> M <input type="checkbox"/> F | <b>DOB:</b> DD / MM / YYYY             |
| <b>HEAD CIRCUMFERENCE (cm):</b>                                                                                                                                                                                                                                                           | <b>WEIGHT (kg):</b>                                                  | <b>LENGTH/HEIGHT (cm):</b>             |
| <b>FATHER'S DETAILS</b>                                                                                                                                                                                                                                                                   |                                                                      |                                        |
| <b>NAME:</b>                                                                                                                                                                                                                                                                              | <b>DOB:</b> DD / MM / YYYY                                           | <b>OCCUPATION:</b>                     |
| <b>EDUCATION</b>                                                                                                                                                                                                                                                                          |                                                                      |                                        |
| <input type="checkbox"/> Illiterate <input type="checkbox"/> Primary <input type="checkbox"/> Secondary <input type="checkbox"/> Higher secondary <input type="checkbox"/> Graduation <input type="checkbox"/> Post-graduation <input type="checkbox"/> Diploma/other trade qualification |                                                                      |                                        |
| <b>MOTHER'S DETAILS</b>                                                                                                                                                                                                                                                                   |                                                                      |                                        |
| <b>NAME:</b>                                                                                                                                                                                                                                                                              | <b>DOB:</b> DD / MM / YYYY                                           | <b>OCCUPATION:</b>                     |
| <b>EDUCATION</b>                                                                                                                                                                                                                                                                          |                                                                      |                                        |
| <input type="checkbox"/> Illiterate <input type="checkbox"/> Primary <input type="checkbox"/> Secondary <input type="checkbox"/> Higher secondary <input type="checkbox"/> Graduation <input type="checkbox"/> Post-graduation <input type="checkbox"/> Diploma/other trade qualification |                                                                      |                                        |
| <b>CONTACT DETAILS</b>                                                                                                                                                                                                                                                                    |                                                                      |                                        |
| <b>DISTRICT:</b>                                                                                                                                                                                                                                                                          |                                                                      | <b>SUB-DISTRICT:</b>                   |
| <b>UNION:</b>                                                                                                                                                                                                                                                                             |                                                                      | <b>VILLAGE:</b>                        |
| <b>POST CODE:</b>                                                                                                                                                                                                                                                                         |                                                                      | <b>PHONE NO.:</b>                      |
| <b>TYPE OF CASE (select one):</b> <input type="checkbox"/> New <input type="checkbox"/> Follow-Up                                                                                                                                                                                         |                                                                      |                                        |
| <b>SEIZURE CONTROL:</b> <input type="checkbox"/> Same <input type="checkbox"/> Better <input type="checkbox"/> Worse                                                                                                                                                                      |                                                                      |                                        |
| <b>SEIZURE FREE ON TREATMENT:</b> <input type="checkbox"/> Yes <input type="checkbox"/> No                                                                                                                                                                                                |                                                                      |                                        |
| <b>COMPLIANT:</b> <input type="checkbox"/> Yes <input type="checkbox"/> No                                                                                                                                                                                                                | <b>IF NO, REASON FOR NON-COMPLIANCE:</b>                             |                                        |
| <b>REASON FOR POOR SEIZURE CONTROL:</b>                                                                                                                                                                                                                                                   |                                                                      |                                        |
| <b>MAIN CONCERN:</b>                                                                                                                                                                                                                                                                      |                                                                      |                                        |
| <b>HISTORY AND EXAMINATION FINDINGS</b>                                                                                                                                                                                                                                                   |                                                                      |                                        |
| <b>BIRTH HISTORY:</b>                                                                                                                                                                                                                                                                     |                                                                      |                                        |
| <b>SEIZURE</b>                                                                                                                                                                                                                                                                            |                                                                      |                                        |
| <b>FIRST:</b>                                                                                                                                                                                                                                                                             |                                                                      | <b>LAST:</b>                           |
| <b>HISTORY OF PROLONGED SEIZURE (&gt; 5 mins):</b> <input type="checkbox"/> Yes <input type="checkbox"/> No                                                                                                                                                                               |                                                                      |                                        |
| <b>CURRENT FREQUENCY:</b> _____ times per <input type="checkbox"/> day <input type="checkbox"/> week <input type="checkbox"/> month <input type="checkbox"/> year                                                                                                                         |                                                                      |                                        |
| <b>TYPE:</b>                                                                                                                                                                                                                                                                              |                                                                      |                                        |
| <b>DURATION OF SEIZURE:</b>                                                                                                                                                                                                                                                               |                                                                      | <b>DESCRIPTION:</b>                    |
| <b>PREVIOUS MEDICATION &amp; INVESTIGATION</b>                                                                                                                                                                                                                                            |                                                                      |                                        |

**Appendix B: Guideline for drug choice at clinics**

**Table of Contents**

**MEDICATIONS FOR SEIZURE MANAGEMENT ..... 4**

- Phenobarbitone ..... 4**
  - Dose range ..... 4
  - Seizure types useful for ..... 4
  - Adverse effects ..... 4
  - Comment ..... 4
- Sodium Valproate ..... 4**
  - Dose Range ..... 4
  - Seizure types useful for ..... 4
  - Adverse effects ..... 4
  - Comment ..... 4
- Clobazam ..... 5**
  - Dose Range ..... 5
  - Seizure types useful for ..... 5
  - Adverse effects ..... 5
  - Comment ..... 5
- Nitrazepam ..... 5**
  - Dose Range ..... 5
  - Seizure types useful for ..... 5
  - Adverse effects ..... 5
  - Comment ..... 6
- Carbamazepine ..... 6**
  - Dose Range ..... 6
  - Seizure types useful for ..... 6
  - Adverse effects ..... 6
  - Comment ..... 6

**MEDICATIONS FOR DYSTONIA/SPASTICITY MANAGEMENT ..... 6**

- Trihexiphenidyl/Benzhexol ..... 6**
  - Dose Range ..... 6
  - Symptoms useful for ..... 6
  - Adverse effects ..... 6
  - Comment ..... 7
- Baclofen ..... 7**
  - Dose Range ..... 7
  - Start Symptoms useful for ..... 7
  - Adverse effects ..... 7
  - Comment ..... 7
- Levodopa/Carbidopa ..... 7**
  - Dose Range ..... 7
  - Symptoms useful for ..... 7
  - Adverse effects ..... 8
  - Comment ..... 8

**MEDICATIONS FOR BEHAVIOUR MANAGEMENT ..... 8**

- Clonidine ..... 8**
  - Dose Range ..... 8
  - Start Symptoms useful for ..... 8



1  
2  
3  
4  
5  
6  
7  
8  
9  
10  
11  
12  
13  
14  
15  
16  
17  
18  
19  
20  
21  
22  
23  
24  
25  
26  
27  
28  
29  
30  
31  
32  
33  
34  
35  
36  
37  
38  
39  
40  
41  
42  
43  
44  
45  
46  
47  
48  
49  
50  
51  
52  
53  
54  
55  
56  
57  
58  
59  
60

[Adverse effects](#) ..... 8

[Comment](#) ..... 8

[Risperidone](#) ..... 8

[Dose Range](#) ..... 8

[Symptoms useful for](#) ..... 8

[Adverse effects](#) ..... 8

[Comment](#) ..... 9

**[MEDICATIONS FOR EMERGENCY MANAGEMENT](#) ..... 9**

[Diazepam](#) ..... 9

[Dose Range](#) ..... 9

[Symptoms useful for](#) ..... 9

[Adverse effects](#) ..... 9

[Comment](#) ..... 9

**[REFERENCES](#) ..... 9**

For peer review only

## MEDICATIONS FOR SEIZURE MANAGEMENT

### ***PHENOBARBITONE***

#### **Dose range**

- 1–6 mg/kg daily in 1 or 2 doses; start at the lower end of range and increase slowly if required.

#### **Seizure types useful for**

- For generalized seizures and focal seizures.
- Recurrent febrile seizures
- Neonatal seizures
- Less likely to help blank staring “absence” seizures

#### **Adverse effects**

- Allergic rash, rarely can cause extreme hypersensitivity reaction
- Hyperactivity
- Sedation

#### **Comment**

- Generally, a good medication to continue unless it is not working or the side effects are not tolerable
- Do not stop suddenly and wean over several weeks if patient has been on it for more than 3 months

### ***SODIUM VALPROATE***

#### **Dose Range**

- 20–40 mg/kg daily in 2 divided doses; start at 5-10 mg/kg/day and increase slowly to 20 mg/kg/day. Then increase further if required.

#### **Seizure types useful for**

- For all seizure types

#### **Adverse effects**

- Hyperactivity
- Liver dysfunction
- Caution with use in children with developmental delay less than two years or older who are likely to not have true CP. Valproate can cause fatal liver dysfunction in those with a history of mitochondrial disorders. This is suggested by a history of developmental regression eg. A child who was able to sit before can no longer do so.

#### **Comment**

- Valproate is likely to work for most seizure types and cause less sedation than phenobarbitone
- Valproate works synergistically with clobazam and lamotrigine.
- Lamotrigine should be introduced very cautiously if someone is already on valproate

**CLOBAZAM****Dose Range**

- Start at 1-2 mg/dose once a day. Can increase as required to
  - 2.5-5 mg BD in children <2 years
  - 5-10 mg BD in children 2-10 years
  - 10 mg TDS in older children
  - maintenance 0.3-1 mg/kg/day in 2 divided doses
- The above doses are a guide and higher doses can be used in younger children if tolerated and if thought to be beneficial for seizure control

**Seizure types useful for**

- For all seizure types
- Also helpful for dystonia management in some cases

**Adverse effects**

- Sedation
- Hyperactivity
- Hallucinations
- Drooling

**Comment**

- Useful monotherapy or add on medication
- Start at small doses like 1 mg BD and grade up
- Can crush tablet and suspend in water to make up small doses if liquid not available
- If difficult for family to understand use quarter tablet / half tablet instead of dissolving
- Wean very slowly similar to phenobarbitone if patient has been taking Clobazam for more than 3 months
- Children can sometimes get used to benzodiazepines. If seizures break through after a few months of good control, then consider swapping over to another benzodiazepine like Nitrazepam.

**NITRAZEPAM****Dose Range**

- Start at 1 month – 2 years: 0.25mg/kg twice daily, up to 0.5mg/kg twice daily
- The above doses are a guide and higher doses can be used in younger children if tolerated and if thought to be beneficial for seizure control

**Seizure types useful for**

- For all seizure types
- Infantile spasms

**Adverse effects**

- Sedation
  - Drooling

**Comment**

- Useful monotherapy or add on medication
- Start at small doses like and grade up
- Wean very slowly similar to phenobarbitone if patient has been taking Nitrazepam for more than 3 months
- Children can sometimes get used to benzodiazepines. If seizures break through after a few months of good control, then consider swapping over to another benzodiazepine like Clobazam.

**CARBAMAZEPINE****Dose Range**

- 10–20 mg/kg daily in 2-3 divided doses; start at 2.5-5 mg/kg/day and increase slowly to 10 mg/kg/day. Then increase further if required. Some patients can respond to low doses 5-10 mg/kg/day and can be maintained on these doses without further increasing unless required

**Seizure types useful for**

- Focal seizures only
- Avoid for generalized, absence and febrile seizures

**Adverse effects**

- Hyperactivity
- Liver dysfunction

**Comment**

- Useful drug for focal seizures, e.g. With hemiplegic CP

**MEDICATIONS FOR DYSTONIA/SPASTICITY MANAGEMENT****TRIHENIPHENIDYL/BENZHEXOL****Dose Range**

- Start at 0.25 mg once a day and gradually increase to 0.25 mg tds.
- If tolerated, can trial up to 2 mg – 4 mg tds
- In older children, higher doses can be used if benefit is noted

**Symptoms useful for**

- Mainly for dystonia management. Can also help drooling due to its anticholinergic properties

**Adverse effects**

- Dry mouth, eyes
- Constipation
- Confusion
- Double vision

- Irritability

**Comment**

- About 25-50% efficacy for dystonia management if side effects are not a problem. Some children can benefit remarkably more
- Avoid other anticholinergic medications or if any of the adverse effects are already a clinical problem
- If not benefit after maximum doses for 3-4 weeks, then discontinue as delayed benefit is unlikely to occur.

**BACLOFEN****Dose Range**

- **2-7 y** -10-40 mg/day divided in three to four doses/day. Start: 2.5-5 mg twice a day, may increase by 5-15 mg/day every 3-4 days, Max: 40 mg/day.
- **8-11 y** - Dose: 10-60 mg/day divided in three to four doses/day. Start: 2.5-5 mg twice a day, may increase by 5-15 mg/day every 3-4 days; Max: 60 mg/day.
- **12 y and older** - Dose: 20-80 mg/day PO divided in three to four doses/day. Start: 5 mg twice a day, may increase by 15 mg/day every 2-3 days; Max: 80 mg/day.

**Start Symptoms useful for**

- Mainly for spasticity management.

**Adverse effects**

- Hypotonia
- Drooling
- Sedation

**Comment**

- Baclofen is a good medication for high tone which is due to spasticity
- It is not so good when there is dominant or mixed dystonia
- Relatively high doses may be needed in some patients making side effects intolerable, these have to be balanced with dose
- Other sedative medications will add to sedative effects and drooling – benzodiazepines, phenobarbitone
- Taper and stop slowly over few weeks if patient has been taking Baclofen for more than 3 months.

**LEVODOPA/CARBIDOPA****Dose Range**

- 1-4 mg/kg/day (levodopa component). Start slowly at 1 mg/kg/day divided in 2 doses and increase to target 4 mg/kg/day in 3 divided doses.
- Can increase further if focal but clear benefit.

**Symptoms useful for**

- Dystonia management
- Can be very helpful when dystonia shows a trend of worsening as the day progresses or is exercise induced

**Adverse effects**

- Nausea

**Comment**

- About 25% efficacy for dystonia management in cerebral palsy but a safe drug to try
- Very useful in genetic dopamine responsive dystonia which can mimic CP but is rare.
- Some preparations are available as Levodopa/Benserazide. Dose guide is same for levodopa component

**MEDICATIONS FOR BEHAVIOUR MANAGEMENT****CLONIDINE****Dose Range**

- Start at 25 micrograms at night for sleep management
- Can increase to 25-100 microgram three times a day for behavior management

**Start Symptoms useful for**

- Management of hyperactive or aggressive behavior. e.g. biting, inattentive in school, disturbs other children, fidgety, can't sit still (these symptoms have to be sufficiently severe to be disruptive to daily home or school life to be considered for treatment)
- Also helpful for episodic management of severe dystonia in patients who get periodic worsening. Doses up to 100 micrograms 4-6 times per day can be helpful for short bursts of 3-4 days. Then wean back to baseline doses or stop

**Adverse effects**

- Sedation
- Sometimes postural dizziness due to postural hypotension – more likely at lower doses

**Comment**

- Wean slowly over a week if patient has been on clonidine for more than 3 months
- Average efficacy for ADHD, stimulants are better

**RISPERIDONE****Dose Range**

- 0.25mg – 5 mg/day in children. Try to manage on least efficacious dose

**Symptoms useful for**

- Management of hyperactive or aggressive behaviour.

**Adverse effects**

- Increased appetite
- Weight gain
- Metabolic disturbance – hyperlipidemia after years of use
- Extrapiramidal effects like rigidity

**Comment**

- Try clonidine first
- Can be quite useful if behavioral issues are really disruptive for daily life.

**MEDICATIONS FOR EMERGENCY MANAGEMENT*****DIAZEPAM*****Dose Range**

- 0.5 mg/kg <6 y/o; 0.3mg/kg 6-11 y/o; 0.2mg/kg >11y/o

**Symptoms useful for**

- Management of prolonged seizures >5 min at home.

**Adverse effects**

- Sedation
- Respiratory depression and arrest
- Local injury

**Comment**

- Only prescribe if family have received education on use and understand the administration process
- If a child is having a seizure in which he/she is convulsing or is unconscious, it is important to follow simple first aid measures ie. protection from injury, positioning on their side to assist breathing.
- Materials needed
  - a 25ml bottle of diazepam mixed with a stabilizing solution, containing 1mg of diazepam in each 1ml (or alternative concentration)
  - a reusable 10ml syringe
  - a reusable soft plastic tube to attach to the syringe for drawing up and injecting the diazepam
  - a sachet of lubricant jelly

**REFERENCES**

- Australian Medicines Handbook
- MIMS Australia
- Epocrates
- [www.rch.org.au](http://www.rch.org.au)
- [www.dhs.wisconsin.gov](http://www.dhs.wisconsin.gov)

**Appendix C: Follow up questionnaire**

|                      |  |           |                |                  |                                                               |
|----------------------|--|-----------|----------------|------------------|---------------------------------------------------------------|
| Child's Name:        |  |           |                | Gender:          | <input type="checkbox"/> Male <input type="checkbox"/> Female |
| Weight in kg:        |  | Phone No: |                | DOB:             | DD/MM/YYYY                                                    |
| Mother's Name:       |  |           | Father's Name: |                  |                                                               |
| Assessment Location: |  |           |                | Assessment Date: | DD/MM/YYYY                                                    |

Check before phone call/follow up clinic:

- Medications and doses the child is on  Was there a change made in the last clinic

Phone Call: 📞

**1. Is your child taking the prescribed medication regularly?**

- No**, is your child taking any other medication?  **Yes** → Fill up table below  **No** → Go to 3  
 **Yes**, (Fill up table below) Has there been any improvements?  **Yes** → Go to 2  **No** → Go to 2

| Name of Medication                                                                                                                             | Formulation                                                       | Dose                                                                                  | Daily Dose Frequency                                                                                        |
|------------------------------------------------------------------------------------------------------------------------------------------------|-------------------------------------------------------------------|---------------------------------------------------------------------------------------|-------------------------------------------------------------------------------------------------------------|
| <input type="checkbox"/> Valproic acid<br>[Valex/Epilim/Epilim/Valpro]                                                                         | <input type="checkbox"/> Syrup<br><input type="checkbox"/> Tablet | <input type="checkbox"/> ___ ml/___spoon<br><input type="checkbox"/> ___ mg, ___ tabs | <input type="checkbox"/> 1 <input type="checkbox"/> 2 <input type="checkbox"/> 3 <input type="checkbox"/> 4 |
| <input type="checkbox"/> Phenobarbitone<br>[Barbit/Berdinal/Emer/Epinal/Pheno/Phenoba/Phenoson]                                                | <input type="checkbox"/> Syrup<br><input type="checkbox"/> Tablet | <input type="checkbox"/> ___ ml/___spoon<br><input type="checkbox"/> ___ mg, ___ tabs | <input type="checkbox"/> 1 <input type="checkbox"/> 2 <input type="checkbox"/> 3 <input type="checkbox"/> 4 |
| <input type="checkbox"/> Epinephrine<br>[Adrinor/Adrenaline/Adrin]                                                                             | <input type="checkbox"/> Injection<br><input type="checkbox"/> IV | <input type="checkbox"/> ___ ml<br><input type="checkbox"/> ___ mg                    | <input type="checkbox"/> 1 <input type="checkbox"/> 2 <input type="checkbox"/> 3 <input type="checkbox"/> 4 |
| <input type="checkbox"/> Benzodiazepine<br>[Clonazepam/Clobazam/Alsiium/Clob/Clobam/Epson/Frisium /Epiclon/Epnil/Leptic/Myotril/Rivotril/Rivo] | <input type="checkbox"/> Syrup<br><input type="checkbox"/> Tablet | <input type="checkbox"/> ___ ml/___spoon<br><input type="checkbox"/> ___ mg, ___ tabs | <input type="checkbox"/> 1 <input type="checkbox"/> 2 <input type="checkbox"/> 3 <input type="checkbox"/> 4 |
| <input type="checkbox"/> Clonidine<br>[Catapres 0.1/Clonipres 0.1]                                                                             | <input type="checkbox"/> Syrup<br><input type="checkbox"/> Tablet | <input type="checkbox"/> ___ ml/___spoon<br><input type="checkbox"/> ___ mg, ___ tab  | <input type="checkbox"/> 1 <input type="checkbox"/> 2 <input type="checkbox"/> 3 <input type="checkbox"/> 4 |
| <input type="checkbox"/> Piracetam<br>[Neurolep/Neuratam/Piratam/Juvain/Piramax]                                                               | <input type="checkbox"/> Syrup<br><input type="checkbox"/> Tablet | <input type="checkbox"/> ___ ml/___spoon<br><input type="checkbox"/> ___ mg, ___ tabs | <input type="checkbox"/> 1 <input type="checkbox"/> 2 <input type="checkbox"/> 3 <input type="checkbox"/> 4 |
| <input type="checkbox"/> Baclofen<br>[Flexifen/Bacofen/Mylofen/Axant/Beclovan]                                                                 | <input type="checkbox"/> Syrup<br><input type="checkbox"/> Tablet | <input type="checkbox"/> ___ ml/___spoon<br><input type="checkbox"/> ___ mg, ___ tabs | <input type="checkbox"/> 1 <input type="checkbox"/> 2 <input type="checkbox"/> 3 <input type="checkbox"/> 4 |
| <input type="checkbox"/> Trihexyphenidyl<br>[Hexinor/Trihexy]                                                                                  | <input type="checkbox"/> Syrup<br><input type="checkbox"/> Tablet | <input type="checkbox"/> ___ ml/___spoon<br><input type="checkbox"/> ___ mg, ___ tabs | <input type="checkbox"/> 1 <input type="checkbox"/> 2 <input type="checkbox"/> 3 <input type="checkbox"/> 4 |
| <input type="checkbox"/> Other(write)                                                                                                          | <input type="checkbox"/> Syrup<br><input type="checkbox"/> Tablet | <input type="checkbox"/> ___ ml/___spoon<br><input type="checkbox"/> ___ mg, ___ tabs | <input type="checkbox"/> 1 <input type="checkbox"/> 2 <input type="checkbox"/> 3 <input type="checkbox"/> 4 |

**2. Is your child seizure free at current dose?**

- Yes** → End  
 **No**, Frequency of seizure: \_\_\_\_\_ per day / week / month / year  
 Average duration of seizure \_\_\_\_\_ minutes/hours

For those **not taking any medicine now:**

**3. Has the medicine caused any problem?**  **Yes** → Fill up table below and end.  **No** → Go to 4.

| Problem                                                                | Immediate action on the phone                   |
|------------------------------------------------------------------------|-------------------------------------------------|
| <input type="checkbox"/> Extensive rash developed on medication        | Stop the medication and need to review urgently |
| <input type="checkbox"/> Child too drowsy to feed safely on medication | Reduce to older dose/previous medication        |
| <input type="checkbox"/> Other Problem:                                |                                                 |

**4. Specify any other reason for not taking prescribed medication regularly:**

\_\_\_\_\_



## STROBE Statement—checklist of items that should be included in reports of observational studies

|                              | Item No | Recommendation                                                                                                                                                                                                                                                                                                                                                                                                                                                         | Page No |
|------------------------------|---------|------------------------------------------------------------------------------------------------------------------------------------------------------------------------------------------------------------------------------------------------------------------------------------------------------------------------------------------------------------------------------------------------------------------------------------------------------------------------|---------|
| <b>Title and abstract</b>    | 1       | (a) Indicate the study's design with a commonly used term in the title or the abstract                                                                                                                                                                                                                                                                                                                                                                                 | 1       |
|                              |         | (b) Provide in the abstract an informative and balanced summary of what was done and what was found                                                                                                                                                                                                                                                                                                                                                                    | 2       |
| <b>Introduction</b>          |         |                                                                                                                                                                                                                                                                                                                                                                                                                                                                        |         |
| Background/rationale         | 2       | Explain the scientific background and rationale for the investigation being reported                                                                                                                                                                                                                                                                                                                                                                                   | 4       |
| Objectives                   | 3       | State specific objectives, including any prespecified hypotheses                                                                                                                                                                                                                                                                                                                                                                                                       | 4       |
| <b>Methods</b>               |         |                                                                                                                                                                                                                                                                                                                                                                                                                                                                        |         |
| Study design                 | 4       | Present key elements of study design early in the paper                                                                                                                                                                                                                                                                                                                                                                                                                | 4-6     |
| Setting                      | 5       | Describe the setting, locations, and relevant dates, including periods of recruitment, exposure, follow-up, and data collection                                                                                                                                                                                                                                                                                                                                        | 4-6     |
| Participants                 | 6       | (a) <i>Cohort study</i> —Give the eligibility criteria, and the sources and methods of selection of participants. Describe methods of follow-up<br><i>Case-control study</i> —Give the eligibility criteria, and the sources and methods of case ascertainment and control selection. Give the rationale for the choice of cases and controls<br><i>Cross-sectional study</i> —Give the eligibility criteria, and the sources and methods of selection of participants | 4-5     |
|                              |         | (b) <i>Cohort study</i> —For matched studies, give matching criteria and number of exposed and unexposed<br><i>Case-control study</i> —For matched studies, give matching criteria and the number of controls per case                                                                                                                                                                                                                                                 | NA      |
| Variables                    | 7       | Clearly define all outcomes, exposures, predictors, potential confounders, and effect modifiers. Give diagnostic criteria, if applicable                                                                                                                                                                                                                                                                                                                               | 4-6     |
| Data sources/<br>measurement | 8*      | For each variable of interest, give sources of data and details of methods of assessment (measurement). Describe comparability of assessment methods if there is more than one group                                                                                                                                                                                                                                                                                   | 4-6     |
| Bias                         | 9       | Describe any efforts to address potential sources of bias                                                                                                                                                                                                                                                                                                                                                                                                              | 4-5     |
| Study size                   | 10      | Explain how the study size was arrived at                                                                                                                                                                                                                                                                                                                                                                                                                              | 4-5     |
| Quantitative variables       | 11      | Explain how quantitative variables were handled in the analyses. If applicable, describe which groupings were chosen and why                                                                                                                                                                                                                                                                                                                                           | 6       |
| Statistical methods          | 12      | (a) Describe all statistical methods, including those used to control for confounding                                                                                                                                                                                                                                                                                                                                                                                  | 6       |
|                              |         | (b) Describe any methods used to examine subgroups and interactions                                                                                                                                                                                                                                                                                                                                                                                                    | NA      |
|                              |         | (c) Explain how missing data were addressed                                                                                                                                                                                                                                                                                                                                                                                                                            | NA      |
|                              | 5       | (d) <i>Cohort study</i> —If applicable, explain how loss to follow-up was addressed<br><i>Case-control study</i> —If applicable, explain how matching of cases and controls was addressed<br><i>Cross-sectional study</i> —If applicable, describe analytical methods taking account of sampling strategy                                                                                                                                                              | 5       |
|                              |         | (e) Describe any sensitivity analyses                                                                                                                                                                                                                                                                                                                                                                                                                                  | NA      |

Continued on next page

| <b>Results</b>           |     |                                                                                                                                                                                                              |          |
|--------------------------|-----|--------------------------------------------------------------------------------------------------------------------------------------------------------------------------------------------------------------|----------|
| Participants             | 13* | (a) Report numbers of individuals at each stage of study—eg numbers potentially eligible, examined for eligibility, confirmed eligible, included in the study, completing follow-up, and analysed            | 4-6      |
|                          |     | (b) Give reasons for non-participation at each stage                                                                                                                                                         | Figure 3 |
|                          |     | (c) Consider use of a flow diagram                                                                                                                                                                           | Figure 1 |
| Descriptive data         | 14* | (a) Give characteristics of study participants (eg demographic, clinical, social) and information on exposures and potential confounders                                                                     | 6        |
|                          |     | (b) Indicate number of participants with missing data for each variable of interest                                                                                                                          | Figure 3 |
|                          |     | (c) <i>Cohort study</i> —Summarise follow-up time (eg, average and total amount)                                                                                                                             |          |
| Outcome data             | 15* | <i>Cohort study</i> —Report numbers of outcome events or summary measures over time                                                                                                                          | 6-8      |
|                          |     | <i>Case-control study</i> —Report numbers in each exposure category, or summary measures of exposure                                                                                                         | NA       |
|                          |     | <i>Cross-sectional study</i> —Report numbers of outcome events or summary measures                                                                                                                           | NA       |
| Main results             | 16  | (a) Give unadjusted estimates and, if applicable, confounder-adjusted estimates and their precision (eg, 95% confidence interval). Make clear which confounders were adjusted for and why they were included | NA       |
|                          |     | (b) Report category boundaries when continuous variables were categorized                                                                                                                                    | NA       |
|                          |     | (c) If relevant, consider translating estimates of relative risk into absolute risk for a meaningful time period                                                                                             | NA       |
| Other analyses           | 17  | Report other analyses done—eg analyses of subgroups and interactions, and sensitivity analyses                                                                                                               | NA       |
| <b>Discussion</b>        |     |                                                                                                                                                                                                              |          |
| Key results              | 18  | Summarise key results with reference to study objectives                                                                                                                                                     | 8-11     |
| Limitations              | 19  | Discuss limitations of the study, taking into account sources of potential bias or imprecision. Discuss both direction and magnitude of any potential bias                                                   | 11       |
| Interpretation           | 20  | Give a cautious overall interpretation of results considering objectives, limitations, multiplicity of analyses, results from similar studies, and other relevant evidence                                   | 8-11     |
| Generalisability         | 21  | Discuss the generalisability (external validity) of the study results                                                                                                                                        | 8-11     |
| <b>Other information</b> |     |                                                                                                                                                                                                              |          |
| Funding                  | 22  | Give the source of funding and the role of the funders for the present study and, if applicable, for the original study on which the present article is based                                                | 11-12    |

\*Give information separately for cases and controls in case-control studies and, if applicable, for exposed and unexposed groups in cohort and cross-sectional studies.

**Note:** An Explanation and Elaboration article discusses each checklist item and gives methodological background and published examples of transparent reporting. The STROBE checklist is best used in conjunction with this article (freely available on the Web sites of PLoS Medicine at <http://www.plosmedicine.org/>, Annals of Internal Medicine at <http://www.annals.org/>, and Epidemiology at <http://www.epidem.com/>). Information on the STROBE Initiative is available at [www.strobe-statement.org](http://www.strobe-statement.org).
